## **Patternize: An R package for quantifying color pattern variation**

Steven M. Van Belleghem<sup>1,2,3</sup>, Riccardo Papa<sup>2</sup>, Humberto Ortiz-Zuazaga<sup>2</sup>, Frederik Hendrickx<sup>4,5</sup>,  
Chris D. Jiggins<sup>1</sup>, W. Owen McMillan<sup>6</sup> and Brian A. Counterman<sup>3</sup>

<sup>1</sup> Department of Zoology, University of Cambridge, Cambridge CB2 3EJ, United Kingdom

<sup>2</sup> Department of Biology, Center for Applied Tropical Ecology and Conservation, University of Puerto Rico, Rio Piedras, Puerto Rico

<sup>3</sup> Department of Biological Sciences, Mississippi State University, 295 Lee Boulevard, Mississippi State, MS 39762, USA

<sup>4</sup> Terrestrial Ecology Unit, Biology Department, Ghent University, Gent, Belgium

<sup>5</sup> Royal Belgian Institute of Natural Sciences, Brussel, Belgium

<sup>6</sup> Smithsonian Tropical Research Institute, Apartado 0843-03092, Panamá, Panama

Keywords: color patterns, heat maps, landmarks, image registration, image segmentation

Corresponding author: [vanbelleghemsteven@hotmail.com](mailto:vanbelleghemsteven@hotmail.com)

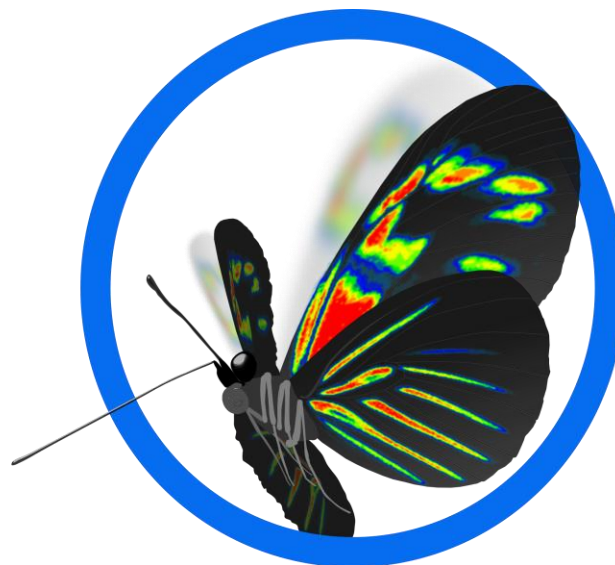

## 1 **Summary**

- 2 1. The use of image data to quantify, study and compare variation in the colors and patterns of  
3 organisms requires the alignment of images to establish homology, followed by color-based  
4 segmentation of images. Here we describe an R package for image alignment and segmentation  
5 that has applications to quantify color patterns in a wide range of organisms.
- 6 2. `patternize` is an R package that quantifies variation in color patterns obtained from image  
7 data. `patternize` first defines homology between pattern positions across specimens either  
8 through fixed landmarks or automated image registration. Pattern identification is performed by  
9 categorizing the distribution of colors using either an RGB threshold or unsupervised image  
10 segmentation.
- 11 3. We demonstrate that `patternize` can be used for quantification of the color patterns in a  
12 variety of organisms by analyzing image data for butterflies, guppies and spiders. Image data can  
13 be compared between sets of specimens, visualized as heatmaps and analyzed using principal  
14 component analysis (PCA).
- 15 4. `patternize` has potential applications for fine scale quantification of color pattern phenotypes  
16 in population comparisons, genetic association studies and investigating the genetic basis of color  
17 pattern expression across a wide range of organisms.

## 18 **Introduction**

19 Natural populations often harbor great phenotypic diversity. Variations in color and patterns are of  
20 the more vivid examples of morphological variability in nature. Taxa as diverse as spiders (De  
21 Busschere *et al.* 2012; Cotoras *et al.* 2016), insects (Katakura *et al.* 1994; Williams 2007), fish  
22 (Endler 1983; Houde 1987), amphibians and reptiles (Calsbeek *et al.* 2008; Stapley *et al.* 2011; Ng  
23 *et al.* 2012; Allen *et al.* 2013; Rabbani *et al.* 2015), mammals (Hoekstra *et al.* 2006; Nekaris &  
24 Jaffe 2007; Allen *et al.* 2015) and plants (Clegg & Durbin 2000; Mascó *et al.* 2004) display natural  
25 variation in pigment or structural colorations. The distribution of colors in specific patterns play an  
26 important role in mate preference (Endler 1983; Kronforst *et al.* 2006), thermal regulation  
27 (Forsman *et al.* 2002), aposematism (Rojas *et al.* 2015) and crypsis (Nosil & Crespi 2006) and  
28 represent evolutionary adaptations that in many cases have promoted diversification within  
29 lineages. In butterflies, for example, the evolution of scale cells and the spatial coordinate system  
30 that controls wing pigmentation has played an important role in their diversification into over  
31 16,000 species of butterflies and 160,000 species of moths (Nijhout 1991).

32 Measuring phenotypic variation in organismal color patterns can provide insights into their  
33 underlying developmental and genetic architecture (Klingenberg 2010). However, precisely  
34 quantifying color pattern variation is challenging. Consistent comparisons of color patterns from  
35 images requires the (1) homologous alignment and (2) color-based segmentation of the images.  
36 Homologous alignment can be performed by transforming one image onto another. This  
37 transformation can be obtained from fixed sets of landmarks or advanced image registration  
38 techniques, which can be stored and utilized to align color patterns extracted from the images.  
39 Image segmentation concerns the categorization of pixels by color. Previously, examples of color  
40 pattern quantification have been developed for *Heliconius* butterflies (Le Poul *et al.* 2014) and  
41 primates (Allen *et al.* 2015). However, these applications are not easily accessible for use in other  
42 organisms. Similarly, advanced solutions are available for biomedical image analysis (Modat *et al.*  
43 2010a; Schindelin *et al.* 2012, 2015), but are not tailored towards quantifying color pattern  
44 variation.

45 Here, we develop `patternize`, an approach to quantification of color pattern variation from 2D  
46 images using the R statistical computing environment (Core Team 2013). The package provides  
47 utilities to extract, transform and superimpose color patterns. While transformations are obtained

48 from fixed landmarks or automated image registration, color-based segmentation of the patterns is  
49 performed by using threshold RGB (Red, Blue and Green) values or unsupervised classification of  
50 pixels into a set of clusters. By extracting and aligning color patterns from image data of large  
51 numbers of samples, *patternize* provides quantitative measures of variation in color patterns  
52 that can be used for population comparisons, genetic association studies and investigating  
53 dominance and epigenetic interactions of color pattern expression in a wide range of organisms.  
54 We demonstrate the utility of the package with *Heliconius* butterflies and more challenging guppy  
55 fish and Galápagos wolf spiders.

56

## 57 **Alignment**

58 Superimposing color patterns to quantify variation in their expression requires the homologous  
59 alignment of the anatomical structures they occur in. Image transformations for this alignment can  
60 be obtained from landmark based transformations and image registration techniques. *Landmark*  
61 *based transformations* use discrete anatomical points that are homologous among individuals in  
62 the analysis. Non-rigid, but uniform transformations from one set of ‘source’ landmarks to a set of  
63 ‘target’ landmarks such as *affine* transformations include translation, rotation, scaling and skewing  
64 (Hazewinkel 2001). Additionally, non-uniform changes in shape between the source and target  
65 landmarks can be accounted for by storing the transformation as if it were ‘the bending of a thin  
66 sheet of metal’, the so-called *thin plate spline* (TPS) transformation (Duchon 1976). Both the affine  
67 and TPS transformation can be calculated from fixed sets of landmarks (Figure 1A). We  
68 implemented these landmark transformations using utilities provided by the R package *MORPHO*  
69 (Schlager 2016). Landmarks can be transformed using an arbitrarily chosen reference sample or an  
70 average landmark shape obtained from a set of samples. The average landmark shape is obtained  
71 by means of Procrustes superimposition of the samples (Goodall 1991).

72 Alternative to landmark based methods, fast and accurate *image registration* techniques are  
73 available for calculating a transformation from a source to target image based on either intensity  
74 patterns or features such as points, lines or contours present in the images (Goshtasby 2005) (Figure  
75 1A). We use a computation efficient intensity-based image registration technique implemented in  
76 the NiftyReg image registration library (TIG 2016) and made available in R through the  
77 *RNiftyReg* package (Clayden *et al.* 2017). This methodology calculates the global

78 transformation of an image by finding correspondences between sub-volumes of the two images  
79 (Modat *et al.* 2010a,b). Correspondence is assessed using intensity-based similarity measures and  
80 used to calculate the transformation parameters through a least trimmed square (LTS) regression  
81 method (Modat *et al.* 2010a,b). The number of corresponding sub-volumes to be included or  
82 considered as outliers in the calculation of the transformation can be varied by the user. The global  
83 transform calculated by NiftyReg can be rigid (i.e. including translation, rotation and scaling) or  
84 affine (i.e. translation, rotation, scaling and skewing). NiftyReg also provides the possibility to  
85 perform local nonlinear transformations (Modat *et al.* 2010b). However, these local nonlinear  
86 transformations are not used in our implementation because the use of intensity measures would  
87 result in warping the color patterns and losing correct assessment of the color pattern variation.

88 Comparison of the landmark and image registration approach applied to the wing color patterns  
89 displayed by *Heliconius* butterflies shows that both methods perform well (Figure 1B). The TPS  
90 transformation used in the landmark approach resulted in a better fit to the internal structures of the  
91 wing (i.e. wing veins). The slight offset between the color pattern and vein position in the image  
92 registration approach likely resulted from a bias in the linear transformation towards aligning the  
93 outline of the wing and not including non-uniform changes in shape within the wing. While the  
94 landmark based approach is computationally faster, automated image registration removes the need  
95 for labor intensive setting of landmarks on each image. Moreover, image registration reduces any  
96 variation introduced by differences in how users manually place image landmarks. Care should be  
97 taken, however, with automated image registration, as it can be highly sensitive to artefacts in the  
98 background. For cases in which the background differs starkly from the studied object,  
99 functionality is included that allows to remove the background using RGB cutoff values. The  
100 package also allows the user to review the image registration progress to assess the quality of the  
101 automatic registration.

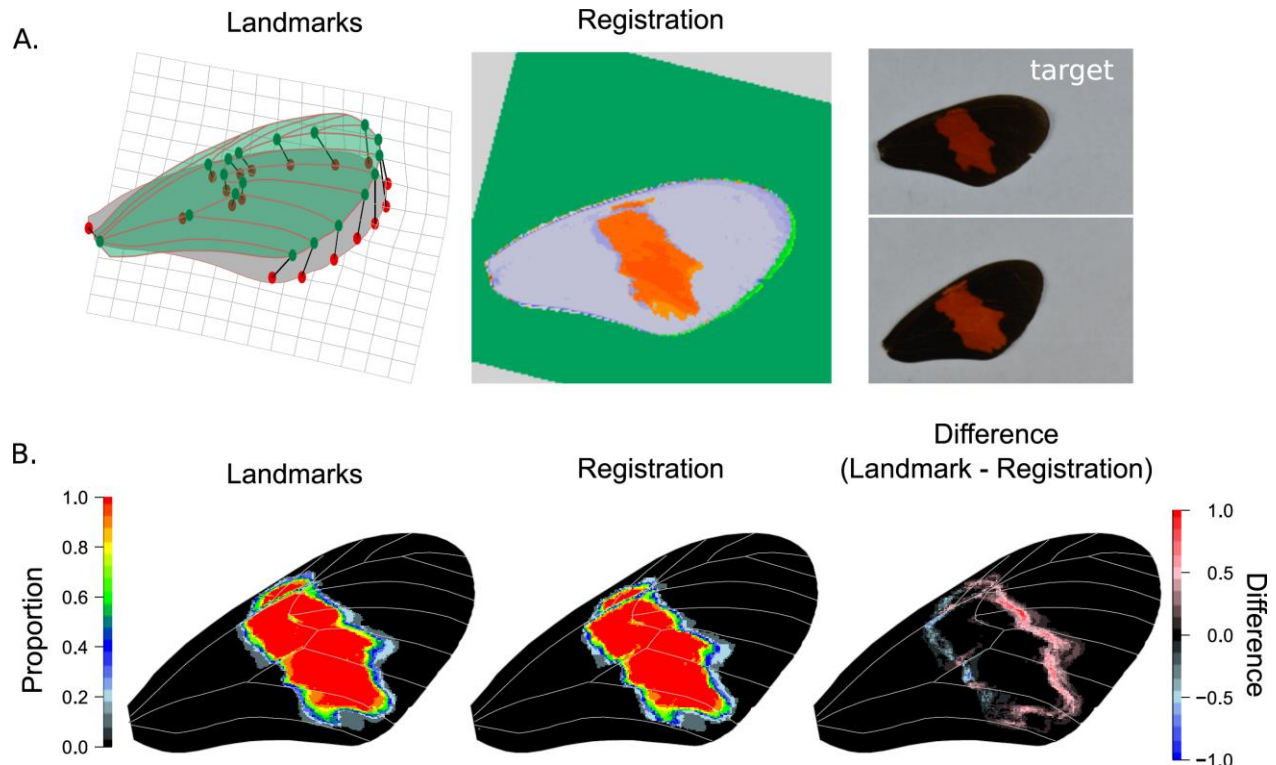

102

103 **Figure 1. Image transformation and quantification of color pattern variation. (A.)** Illustration of transformation  
104 strategies of a source (green) image to a target (gray) image. The thin plate spline (TPS) transformation from the source  
105 to target landmarks is illustrated by the deformed grid and can be used to transform the image or extracted color pattern.  
106 Image registration attempts to find common patterns in images and align the source (green) image to the pixel  
107 coordinate system of the target (gray) image. Note the extracted color pattern in red. **(B.)** Example comparison between  
108 landmark approach for color pattern alignment for ten butterfly wings of male *Heliconius erato hydara*. For the  
109 landmark approach, we used TPS transformation. For the image registration approach, we used affine transformation  
110 and 75% of sub-volumes included as inliers.

111

## 112 **Color pattern extraction**

113 Studying variation in color patterns requires the correct identification of the color boundaries. Color  
114 boundaries can be extracted from images or the trait of interest using RGB thresholds. By selecting  
115 pixels within a specified color range (specified as RGB value and offset) we provide a basic image  
116 segmentation approach that works well for extracting distinct color patterns. Additionally, for  
117 distinct color patterns, the specified RGB value can be iteratively recalculated as the average for  
118 the extracted color pixels. This latter approach permits patterns to be easily combined when  
119 extracted from sets of images that may have been taken under different light conditions resulting  
120 in differences in intensity and contrast. Here, we demonstrated the utility of this approach for color  
121 patterns expressed by *Heliconius erato* butterflies and hybrid phenotypes. Our application allows

122 to differentiate the two groups of butterflies and indicates overexpression of the color pattern in  
123 hybrids that have red instead of yellow scales in their forewing (Figure 2).

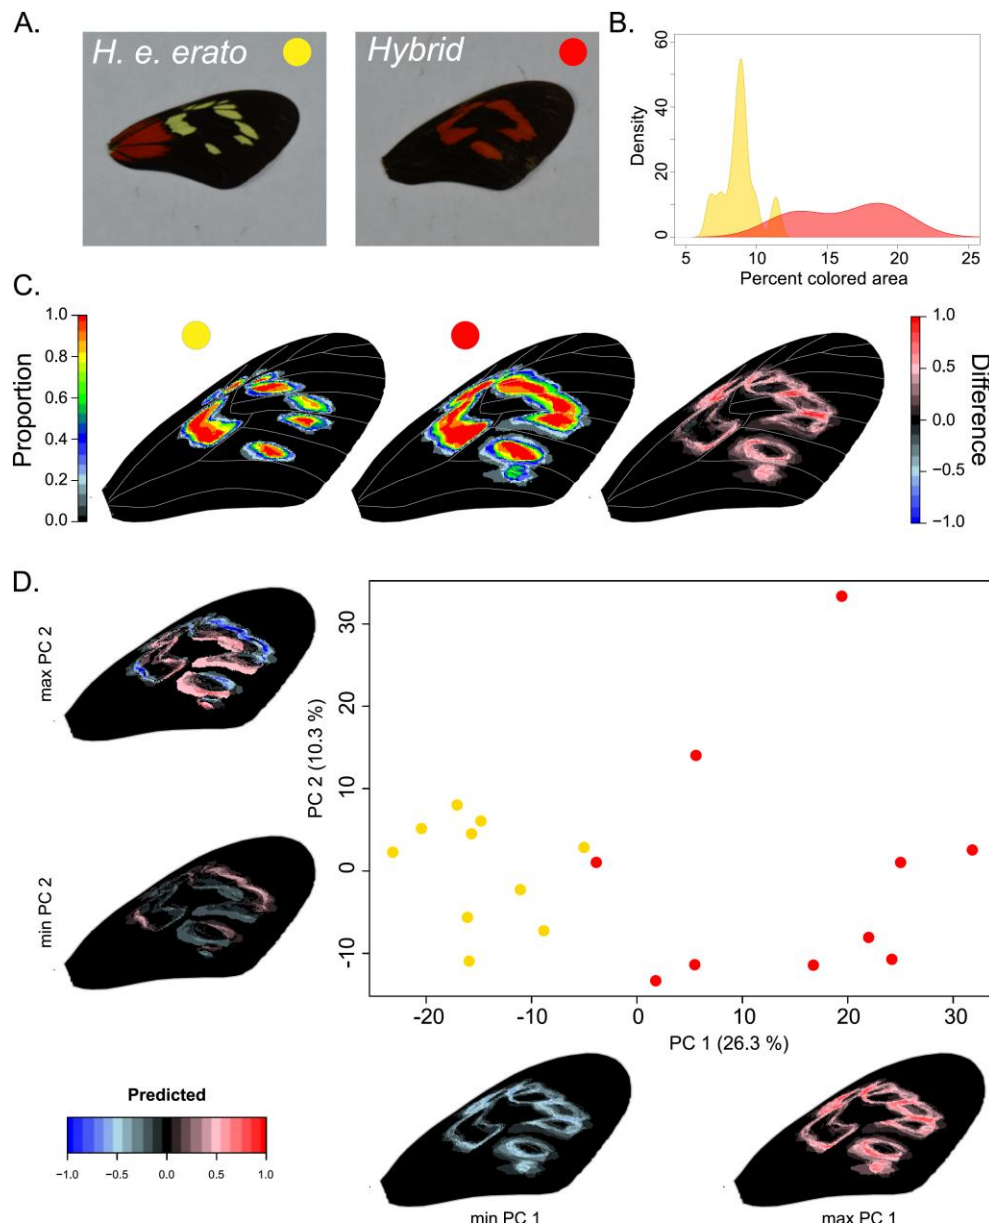

124  
125 **Figure 2. Example of image registration and threshold color extraction in *Heliconius erato erato* (n = 10) and**  
126 **hybrid (n = 10) butterflies (French Guiana).** (A.) Example of original images. The hybrid represents a naturally  
127 occurring backcross in a hybrid zone with *H. e. hydara* (see Figure 1) that results in red color expression in the forewing  
128 band. (B.) The percentage of area in the wing expressing yellow in *H. e. erato* and red in the hybrid shows a consistent  
129 expansion of the forewing band when red is expressed. (C.) Similarly, visualizing the variation in color pattern  
130 expression in a heatmap shows a consistently larger pattern in the hybrid phenotypes (*H. e. erato*: left, hybrid: middle,  
131 hybrid minus *H. e. erato*: right). (D.) Principal component analysis (PCA) confirms that the main axis of variation  
132 (PC1) is related to size of the pattern (yellow or red in *H. e. erato* and hybrids, respectively) and separates the *H. e.*  
133 *erato* and hybrid samples. The second principal component (PC2) axis highlights more complex shape differences in  
134 the forewing band among the samples as demonstrated by the shape changes of the color patterns along the principal  
135 component axis.

136 We also implemented an unsupervised approach for color-based image segmentation by using  $k$ -  
137 means clustering (Hartigan & Wong 1979). This algorithm partitions an image into  $k$  clusters by  
138 iteratively assigning each pixel in the image to the cluster that minimizes the distance between the  
139 pixel and the cluster centers. Cluster centers are recalculated each iteration by averaging all pixels  
140 in the cluster until convergence.

141 We implemented  $k$ -means clustering using the R package `stats` (Core Team 2013). Clusters are  
142 first obtained from a reference image and then used as initial cluster centers for the further analysis.  
143 This allows the program to match clusters that represent the same color pattern in different images.  
144 For  $k$ -means clustering, the number of clusters must be defined manually. For organisms with less  
145 distinct pattern boundaries, this is best done by testing different numbers of clusters and choosing  
146 a number that best assigns pixels to color patterns.

147 To characterize variation in color patterns among samples, we implemented linear principal  
148 component analysis (PCA). For a specific color or  $k$ -means color cluster, PCA can be performed  
149 on the binary representation of the aligned color pattern rasters obtained from each sample (Figure  
150 2-4). In this matrix, pixel coordinates that have the color of interest in a sample get a value of one,  
151 whereas pixel coordinates without the color get the value zero assigned. The variance-covariance  
152 matrix obtained from the binary matrix for a color is suitable for PCA to visualize the main  
153 variations in color pattern boundaries among or between groups of samples. Subsequently,  
154 predicted color pattern changes can be visualized along the principal component (PC) axis (Johnson  
155 & Wichern 2007). Positive values present a higher predicted expression of the pattern, whereas  
156 negative values present the absence of the pattern. Note that parts of the color patterns that are  
157 expressed in all considered samples get a predicted value of zero, as these pixels do not contribute  
158 variance for the PCA analysis.

159

## 160 **Guppies and spiders**

161 To assess the general utility of our application across taxa, we applied the automated registration  
162 and  $k$ -means clustering approach to groups with more complex body shape and color pattern  
163 variation; guppy fish and Galápagos wolf spiders. Males of the guppy (*Poecilia reticulata*) vary  
164 greatly in their ornamental patterns that have evolved in response to both natural and sexual



165 selection. Several mutants have been described among male guppies that affect color pattern  
 166 expression. Manually quantifying the differences in color pattern expression among these  
 167 mutations has provided valuable insights into the developmental basis and interactions of the  
 168 involved genes (Kottler *et al.* 2013). Here, we summarized and compared the black and orange  
 169 color patterns expressed in wild type (WT) versus *golden* mutants of *P. reticulata* males using  
 170 images obtained from Kottler *et al.* 2013 (images were used from backcrosses obtained from *golden*  
 171 *blue* mutant females with heterozygous males from crossing *golden blue* with inbred wild-derived  
 172 Cumána populations) (Figure 3). All images were aligned to a target image using image registration  
 173 and colors were *k*-means clustered into seven groups. Before *k*-means color clustering, the  
 174 background was masked using the outline of the guppy in the target image. Our analysis of the  
 175 black and orange color cluster strongly matched the description presented in Kottler *et al.* 2013,  
 176 demonstrating the absence of a posterior orange spot in *golden* mutants backcrossed into a Cumána  
 177 population genetic background and more diffuse and shifted black ornaments in the *golden* mutants.

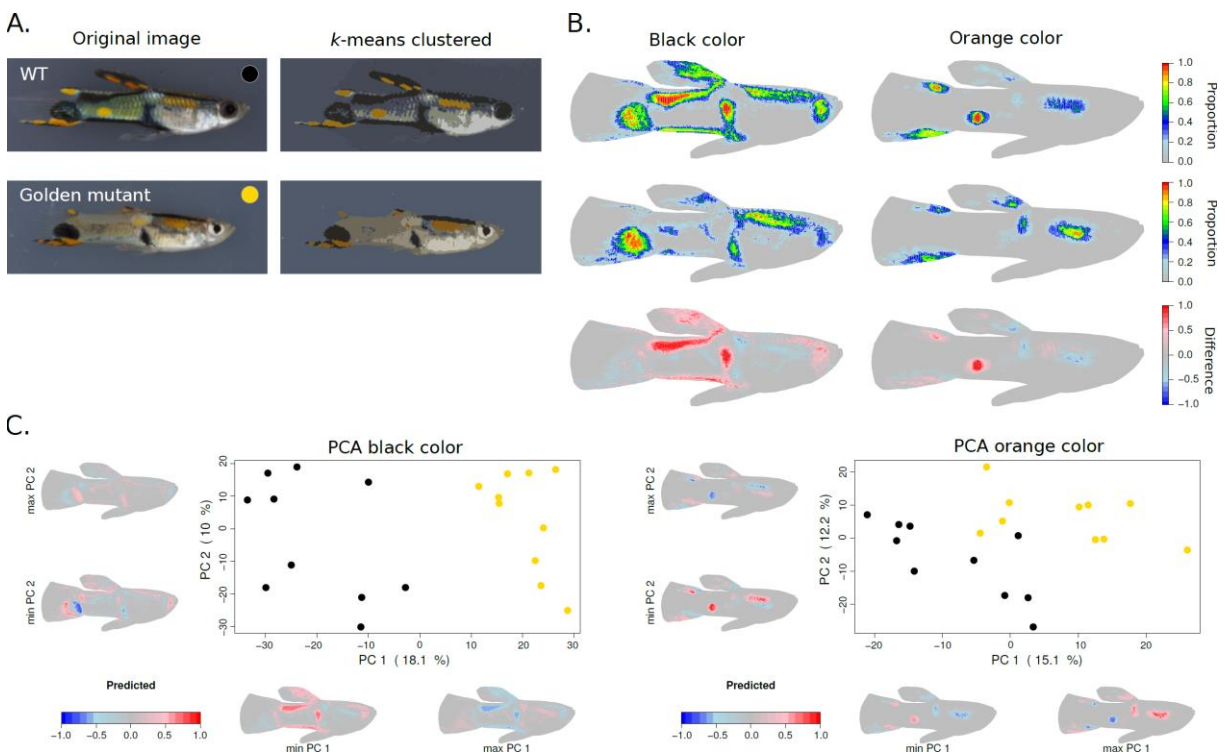

178  
 179 **Figure 3. Example of image registration and *k*-means clustering of colors in guppies (*Poecilia reticulata*).** (A.)  
 180 Original image of a wild type (WT) and *golden* mutant guppy and their *k*-means clustered representation (clusters =  
 181 7). Clusters are first obtained from a reference image and then used as initial cluster centers for the further analysis.  
 182 This allows the program to match clusters that represent the same color pattern in different images. (B.) Heat maps and  
 183 difference between WT (n=10) and golden mutant (n=10) for black and orange color clusters. (D.) PCA analysis of the  
 184 pixel matrices obtained for the black (left) and orange (right) color clusters. Images were obtained with permission  
 185 from (Kottler *et al.* 2013).

186 Wolf spiders of the genus *Hogna* inhabit high elevation and coastal habitats on the Galápagos  
187 islands Santa Cruz and San Cristobal (De Busschere *et al.* 2010). Despite the phylogenetically close  
188 relationship of the high elevation and coastal populations within both islands, morphometric  
189 analysis, including measurements of color intensity, have highlighted striking parallel phenotypic  
190 divergence between the high elevation and coastal species between the islands (De Busschere *et al.*  
191 2012). Coastal species appear to be paler with a more conspicuous median band on the carapace  
192 compared to high elevation species. Here, we demonstrate the robustness of automated image  
193 registration by aligning the highly variable images of the wolf spiders (Figure 4). By focusing on  
194 correspondence between the images, the automated image registration technique, as implemented  
195 in NiftyReg (TIG 2016), manages to align the spider's carapace, which is morphologically the most  
196 consistent part in the images. By assigning colors in the spiders to only two clusters, we show a  
197 similar pattern as described in De Busschere *et al.* 2012 in which the coastal species show a  
198 consistently broader and more conspicuous median band on the carapace and pale lateral bands  
199 compared to the high elevation species.

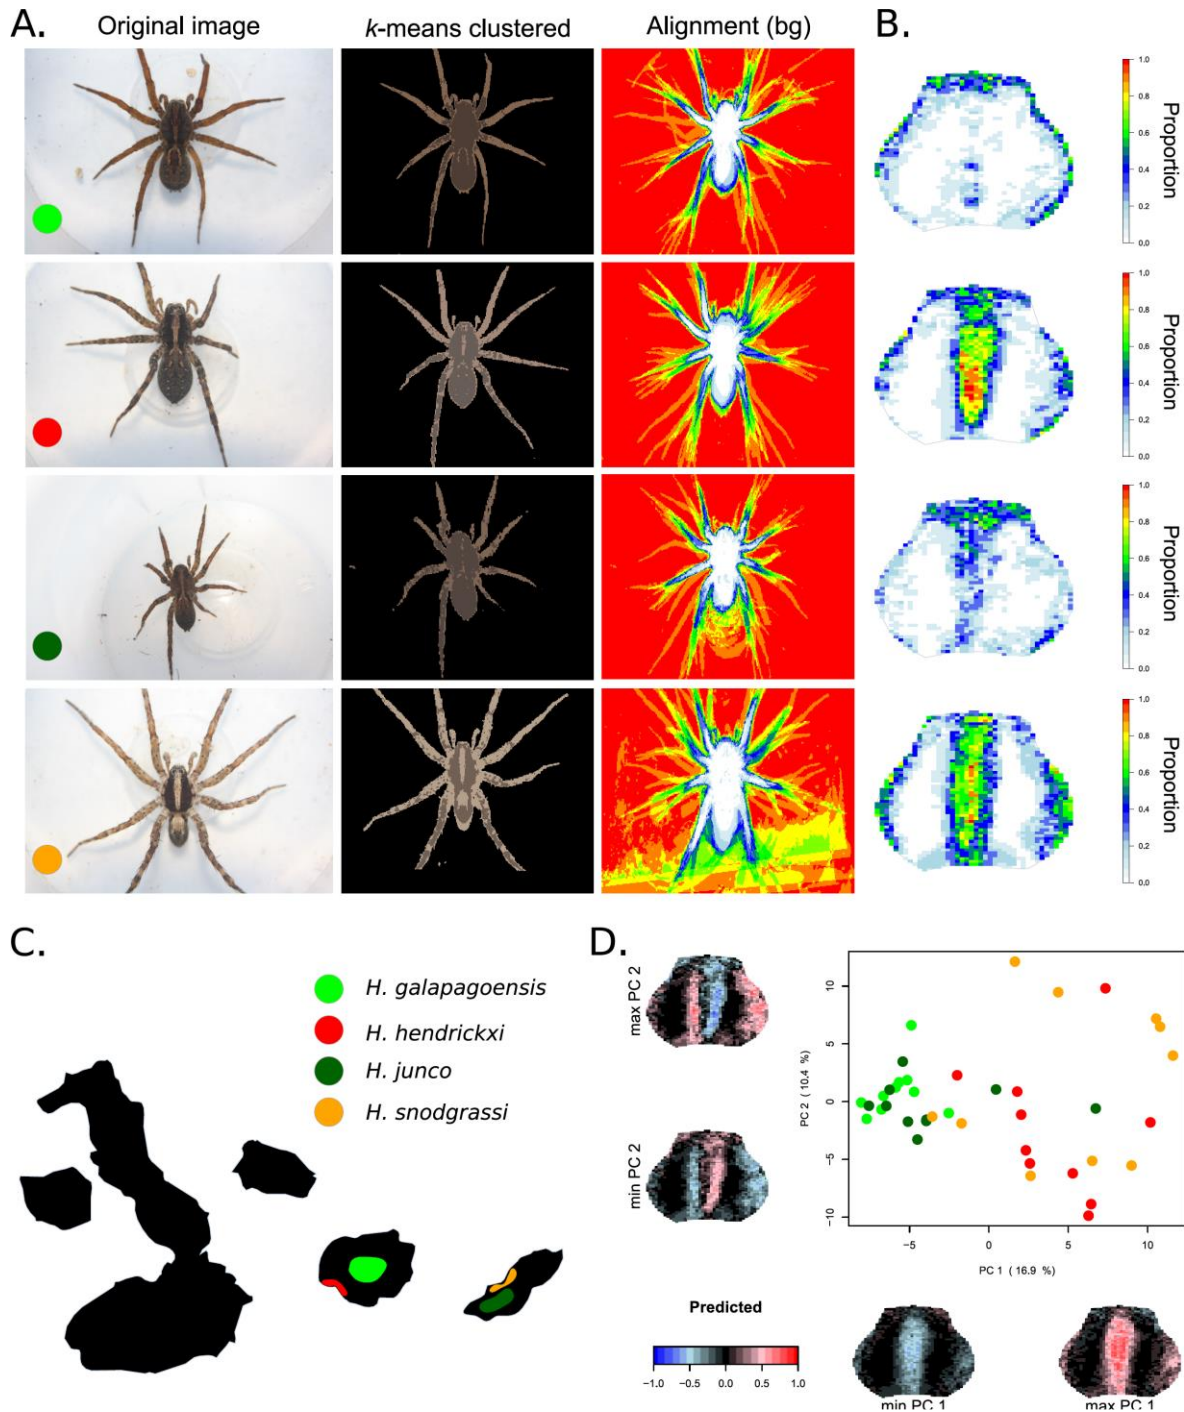

200

201 **Figure 4. Example of image registration and *k*-means clustering of the color pattern of Galápagos wolf spiders**  
 202 **(*Hogna*).** (A.) From left to right: example of original image (10 images were used for each species), *k*-means clustered  
 203 image (*k* = 3) with removed background and alignment of the color cluster that corresponds to the background (bg)  
 204 color. (B.) Heatmap corresponding to the lightest color cluster focused on the carapace. (C.) Map of the Galápagos  
 205 islands with colors indicating the distribution of four *Hogna* species, two high elevation species (light and dark green)  
 206 and two coastal species (red and orange). (D.) PCA analysis of the pixel matrices obtained for the lightest color cluster  
 207 demonstrates that the coastal (*H. hendrickxi* and *H. snodgrassi*) and high-elevation (*H. galapagoensis* and *H. junco*)  
 208 species cluster phenotypically together and share, respectively, the presence and absence of a pale median band on  
 209 their carapace. Images were obtained with permission from (De Busschere *et al.* 2012).

## 210 **Concluding remarks**

211 `patternize` provides an unbiased, fast and user-friendly approach for color pattern analysis that  
212 is applicable to a wide variety of organisms. `patternize` allows downsampling of the images,  
213 which decreases computation time for both calculating the image transformations and the color  
214 pattern extraction. Automated image registration reduces the need for labor intensive landmark  
215 setting. However, because automated registration uses intensity patterns in the images, care should  
216 be taken by standardizing the experimental setup. Setting correct RGB or cluster parameters may  
217 impact results and should be optimized for each analysis. Appropriate RGB and offset values can  
218 be obtained, for instance, by extracting RGB histograms for image areas of interest (Schindelin *et*  
219 *al.* 2012). Using few or many *k*-means clusters may, respectively, result in grouping colors of  
220 interest or assigning multiple clusters to a single pattern of interest. The output of the main  
221 `patternize` functions are `raster` objects (Hijmans 2016) that provide for a wide range of  
222 downstream analyses. We provide functions to intersect (masking) the extracted patterns with  
223 defined outlines (polygons), to calculate the relative area in which the pattern is expressed and to  
224 carry out principal component analysis (PCA). Overall, we hope that this readily accessible R  
225 package will provide useful tools for the community of researchers working on color and pattern  
226 variation in animals.

227

## 228 **Acknowledgments**

229 We kindly thank Jon Clayden for help with implementing RNiftyReg, Stefan Schlager for help  
230 with Morpho, Heather Smith for help with digitizing the *Heliconius* images and Verena Kottler and  
231 Charlotte De Busschere for allowing us to use the guppy and *Hogna* images. SMVB and BAC were  
232 funded by NSF grant DEB-1257839. HOZ was supported in part by NIH grant 5P20GM103475-  
233 13. All authors declared that they have no conflict of interest.

234

235

## 236 **Data accessibility**

237 The package is available as library(“patternize”) on CRAN ([cran.r-](http://cran.r-project.org/web/packages/patternize)  
238 [project.org/web/packages/patternize](http://cran.r-project.org/web/packages/patternize)). The code, ongoing developments and data and code used for  
239 the examples can be accessed through GitHub ([github.com/StevenVB12/patternize](https://github.com/StevenVB12/patternize);  
240 [github.com/StevenVB12/patternize-examples](https://github.com/StevenVB12/patternize-examples)). Bug reports and feature requests can be sent using  
241 the GitHub issue tracker.

242

## 243 **Author contributions**

244 SMVB and BAC conceived the development of the package. SMVB wrote the code. SMVB, RP and BAC  
245 wrote the manuscript. HOZ helped improving the code. SMVB, BAC, FH and RP conceived data  
246 acquisition. HOZ, FH, CDJ and WOM contributed helpful comments for building the package and writing  
247 the manuscript. All authors contributed critically to the drafts and gave final approval for publication.

248

## 249 **References**

- 250 Allen, W.L., Baddeley, R., Scott-samuel, N.E. & Cuthill, I.C. (2013). The evolution and function of pattern diversity  
251 in snakes. *Behavioral Ecology*, **24**, 1237–1250.
- 252 Allen, W.L., Higham, J.P. & Allen, W.L. (2015). Assessing the potential information content of multicomponent  
253 visual signals: a machine learning approach. *Proceedings of the Royal Society B*, **282**, 20142284.
- 254 Calsbeek, R., Bonneaud, C. & Smith, T.B. (2008). Differential fitness effects of immunocompetence and  
255 neighbourhood density in alternative female lizard morphs. 103–109.
- 256 Clayden, J., Modat, M., Presles, B., Anthopoulos, T. & Daga, P. (2017). RNiftyReg: Image Registration Using the  
257 ‘NiftyReg’ Library. R package version 2.5.0. <https://CRAN.R-project.org/package=RNiftyReg>.
- 258 Clegg, M.T. & Durbin, M.L. (2000). Flower color variation: A model for the experimental study of evolution.  
259 *Proceedings of the National Academy of Sciences*, **97**, 7016–7023.
- 260 Core Team, R. (2013). *R: A language and environment for statistical computing*. R Foundation for Statistical  
261 Computing, Vienna, Austria.
- 262 Cotoras, D.D., Brewer, M.S., Croucher, P.J.P., Geoff, S., Lindberg, D.R. & Gillespie, R.G. (2016). Convergent  
263 evolution in the colour polymorphism of *Selkirkiella* spiders (Theridiidae) from the South American temperate  
264 rainforest. *Biological Journal of the Linnean Society*.
- 265 De Busschere, C., Baert, L., Van Belleghem, S.M., Dekoninck, W. & Hendrickx, F. (2012). Parallel phenotypic  
266 evolution in a wolf spider radiation on Galápagos. *Biological Journal of the Linnean Society*, **106**, 123–136.
- 267 De Busschere, C., Hendrickx, F., Van Belleghem, S.M., Backeljau, T., Lens, L. & Baert, L. (2010). Parallel habitat  
268 specialization within the wolf spider genus *Hogna* from the Galápagos. *Molecular ecology*, **19**, 4029–4045.
- 269 Duchon, J. (1976). Splines minimizing rotation invariant semi-norms in Sobolev spaces. *Volume 571 of the series*  
270 *Lecture Notes in Mathematicss* (eds W. Schempp & K. Zeller), pp. 85–100. Springer.
- 271 Endler, J.A. (1983). Natural and sexual selection on color patterns in poeciliid fishes. *Environmental Biology of*  
272 *Fishes*, **9**, 173–190.
- 273 Forsman, A., Ringblom, K., Civantos, E. & Ahnesjö, J. (2002). Coevolution of color pattern and thermoregulatory  
274 behavior in polymorphic pygmy grasshoppers *Tetrix undulata*. *Evolution*, **56**, 349–360.
- 275 Goodall, C. (1991). Procrustes methods in the statistical analysis of shape. *Journal of the Royal Statistical Society.*  
276 *Series B*, **53**, 285–339.

- 277 Goshtasby, A. (2005). *2-D and 3-D image registration: for medical, remote sensing, and industrial applications*.  
278 Wiley, Hoboken, NJ.
- 279 Hartigan, J.A. & Wong, M.A. (1979). Algorithm AS 136: A k-means clustering algorithm. *Journal of the Royal*  
280 *Statistical Society. Series B*, **28**, 100–108.
- 281 Hazewinkel, M. (Ed.). (2001). Affine transformation. *Encyclopedia of Mathematics*. Springer.
- 282 Hijmans, R.J. (2016). raster: Geographic data analysis and modeling. R package version 2.5-8. [http://cran.r-](http://cran.r-project.org/package=raster)  
283 [project.org/package=raster](http://cran.r-project.org/package=raster).
- 284 Hoekstra, H.E., Hirschmann, R.J., Bunday, R. a, Insel, P. a & Crossland, J.P. (2006). A single amino acid mutation  
285 contributes to adaptive beach mouse color pattern. *Science*, **313**, 101–104.
- 286 Houde, A.E. (1987). Mate choice based upon naturally occurring color-pattern variation in a guppy population.  
287 *Evolution*, **41**, 1–10.
- 288 Johnson, R.A. & Wichern, D.W. (2007). *Applied multivariate statistical analysis*, 6th Edition. Pearson.
- 289 Katakura, H., Saitoh, S., Nakamura, K. & Abbas, I. (1994). Multivariate analyses of elytral spot patterns in the  
290 phytophagous ladybird beetle *Epilachna vigintioctopunctata* (Coleoptera, Coccinellidae) in the province of  
291 Sumatra Barat, Indonesia. *Zoological science*, **11**, 889–894.
- 292 Klingenberg, C.P. (2010). Evolution and development of shape: integrating quantitative approaches. *Nature*, **11**,  
293 623–635.
- 294 Kottler, V.A., Fadeev, A., Weigel, D. & Dreyer, C. (2013). Pigment pattern formation in the guppy, *Poecilia*  
295 *reticulata*, involves the Kita and Csf1ra receptor tyrosine kinases. *Genetics*, **194**, 631–646.
- 296 Kronforst, M.R., Young, L.G., Kapan, D.D., McNeely, C., O’Neill, R.J. & Gilbert, L.E. (2006). Linkage of butterfly  
297 mate preference and wing color preference cue at the genomic location of *wingless*. *Proceedings of the*  
298 *National Academy of Sciences of the United States of America*, **103**, 6575–6580.
- 299 Le Poul, Y., Whibley, A., Chouteau, M., Prunier, F., Llaurens, V. & Joron, M. (2014). Evolution of dominance  
300 mechanisms at a butterfly mimicry supergene. *Nature Communications*, **5**, 1–8.
- 301 Mascó, M., Noy-Meir, I. & Sérsic, A.N. (2004). Geographic variation in flower color patterns within *Calceolaria*  
302 *uniflora* Lam. in Southern Patagonia. *Plant Systematics and Evolution*, **244**, 77–91.
- 303 Modat, M., McClelland, J. & Ourselin, S. (2010a). Lung registration using the NiftyReg package. *Medical Image*  
304 *Analysis for the Clinic: A Grand Challenge, Workshop Proc. from MICCAI 2010*, 33–42.
- 305 Modat, M., Ridgway, G.R., Taylor, Z.A., Lehmann, M., Barnes, J., Hawkes, D.J., Fox, N.C. & Ourselin, S. (2010b).  
306 Fast free-form deformation using graphics processing units. *Computer Methods and Programs in Biomedicine*,  
307 **98**, 278–284.
- 308 Nekaris, K.A.I. & Jaffe, S. (2007). Unexpected diversity of slow lorises (*Nycticebus spp.*) within the Javan pet trade:  
309 implications for slow loris taxonomy. *Contributions to Zoology*, **76**, 187–196.
- 310 Ng, J., Landeen, E.L., Logsdon, R.M. & Glor, R.E. (2012). Correlation between *Anolis* lizard dewlap phenotype and  
311 environmental variation indicates adaptive divergence of a signal important to sexual selection and species  
312 recognition. *Evolution*, **67**, 573–582.
- 313 Nijhout, H.F. (1991). *The development and evolution of butterfly wing patterns*. Smithsonian Institution Press.
- 314 Nosil, P. & Crespi, B.J. (2006). Experimental evidence that predation promotes divergence in adaptive radiation.  
315 *Proceedings of the National Academy of Sciences*, **103**, 9090–9095.
- 316 Rabbani, M., Zacharczenko, B., Green, D.M., Abbani, M.O.R. & Acharczenko, B.R.Z. (2015). Color pattern  
317 variation in a cryptic amphibian, *Anaxyrus fowleri*. *Journal of Herpetology*, **49**, 649–654.
- 318 Rojas, B., Valkonen, J. & Nokelainen, O. (2015). Aposematism. Quick guide. *Current biology*, **25**, R350–R351.
- 319 Schindelin, J., Arganda-carreras, I., Frise, E., Kaynig, V., Longair, M., Pietzsch, T., Preibisch, S., Rueden, C.,  
320 Saalfeld, S., Schmid, B., Tinevez, J., White, D.J., Hartenstein, V., Eliceiri, K., Tomancak, P. & Cardona, A.  
321 (2012). Fiji: an open-source platform for biological-image analysis. *Nature Methods*, **9**, 676–682.
- 322 Schindelin, J., Rueden, C.T., Hiner, M.C. & Eliceiri, K.W. (2015). The ImageJ ecosystem: An open platform for  
323 biomedical image analysis. *Molecular reproduction & Development*, **82**, 518–529.
- 324 Schlager, S. (2016). Morpho: Calculations and visualisations related to geometric morphometrics. R package version  
325 2.3.1.1. <http://cran.r-project.org/package=Morpho>.
- 326 Stapley, J., Wordley, C. & Slate, J. (2011). No evidence of genetic differentiation between anoles with different  
327 dewlap color patterns. *Journal of Heredity*, **102**, 118–124.
- 328 TIG. (2016). Nifty Reg.
- 329 Williams, P. (2007). The distribution of bumblebee colour patterns worldwide: possible significance for  
330 thermoregulation, crypsis, and warning mimicry. *Biological Journal of the Linnean Society*, **92**, 97–118.
- 331

A.

Landmarks

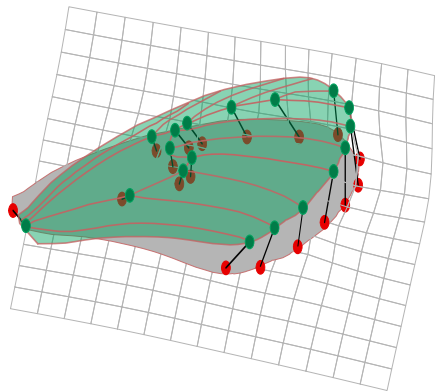

Registration

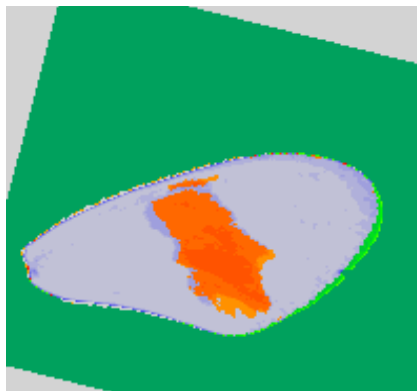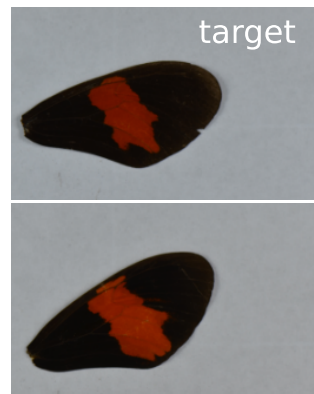

B.

Landmarks

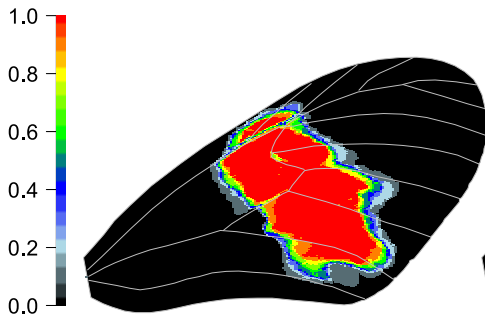

Registration

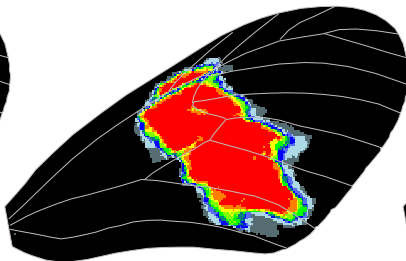Difference  
(Landmark - Registration)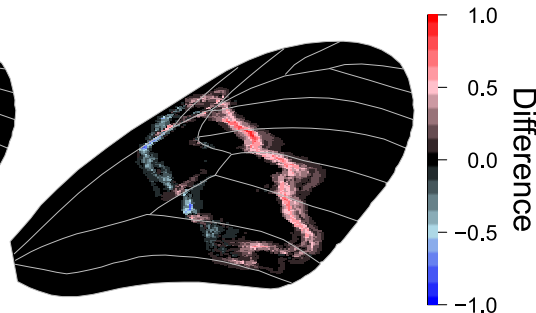

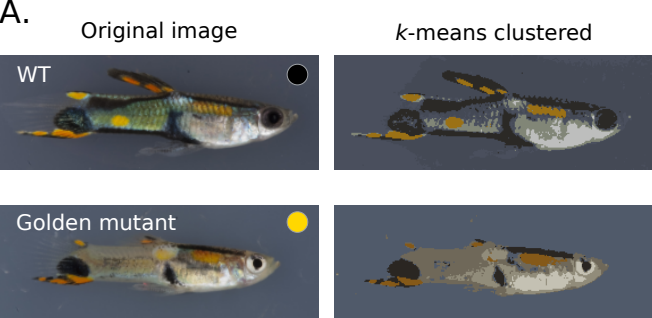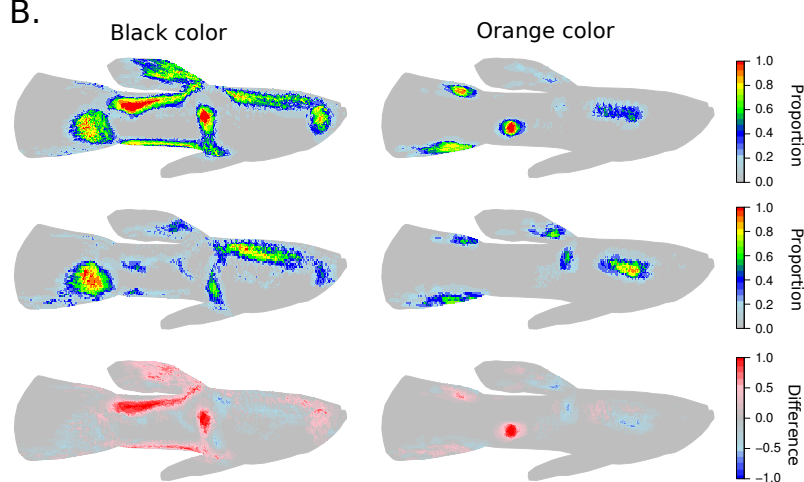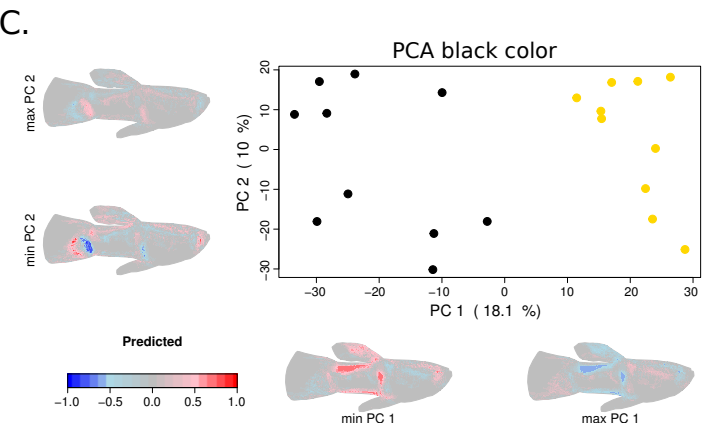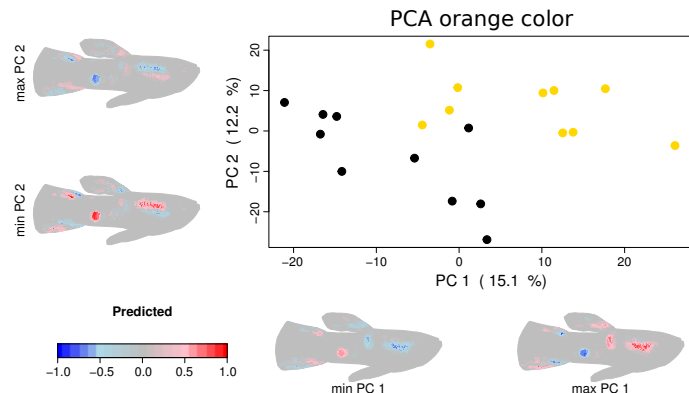



A.

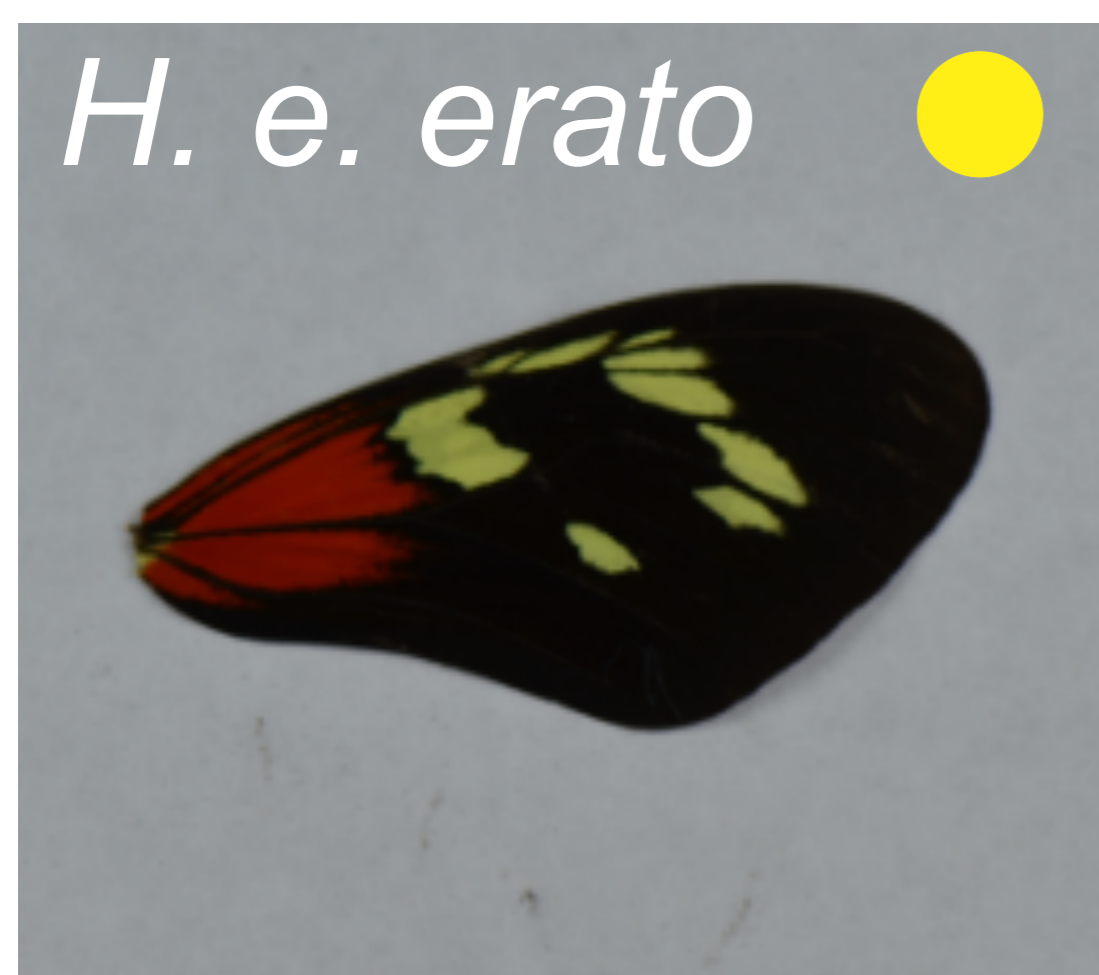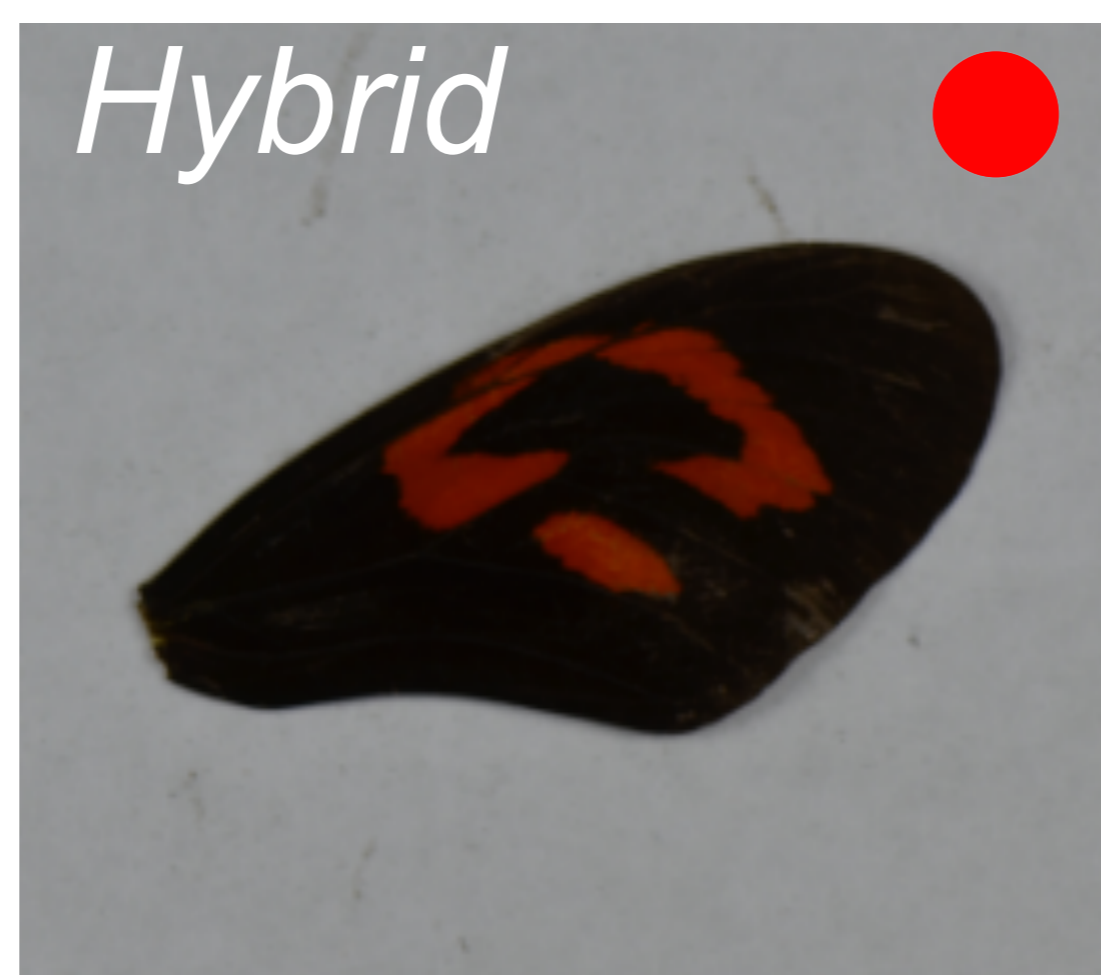

B.

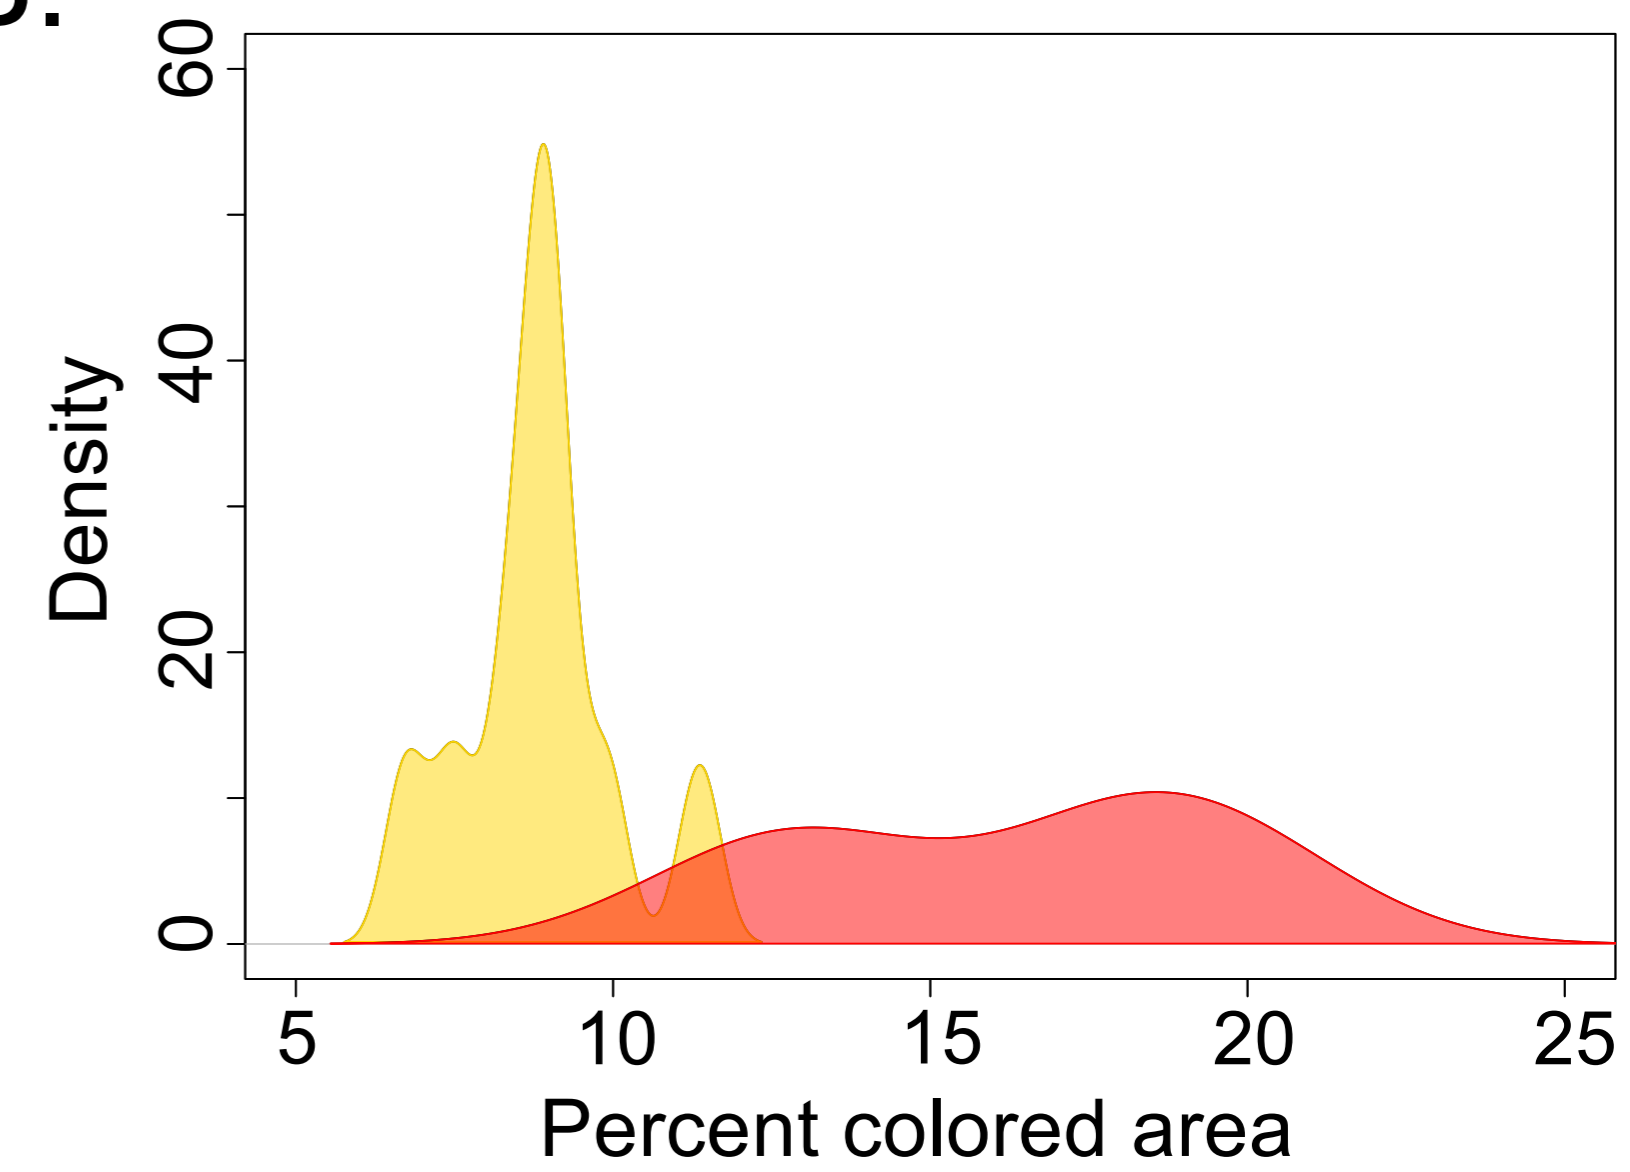

C.

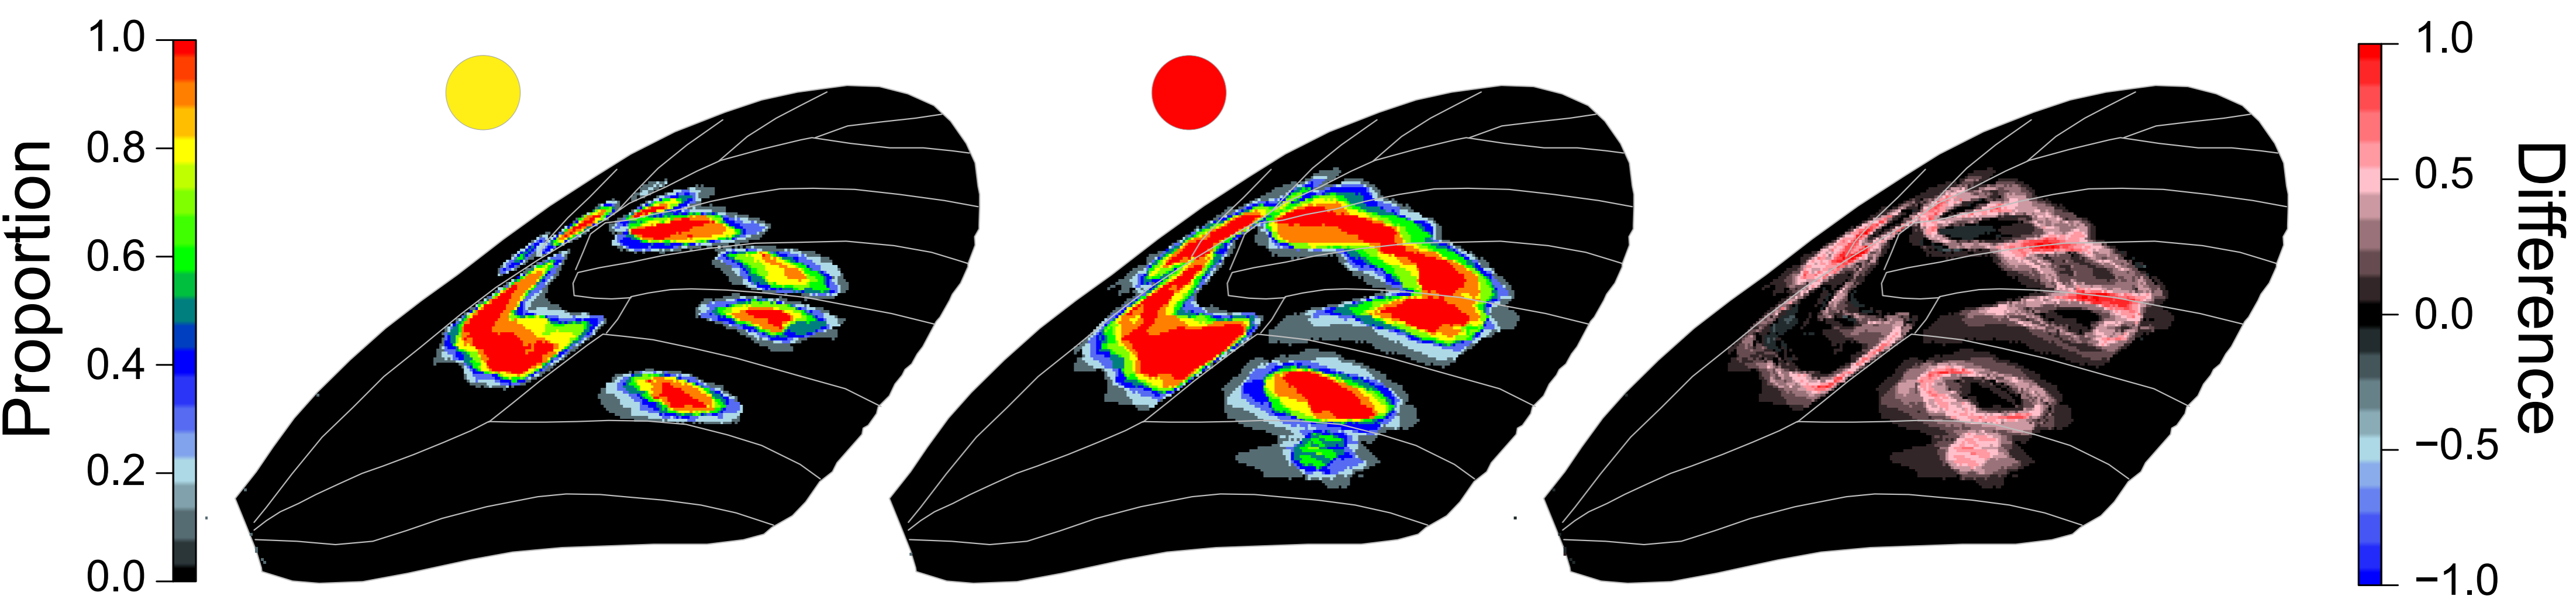

D.

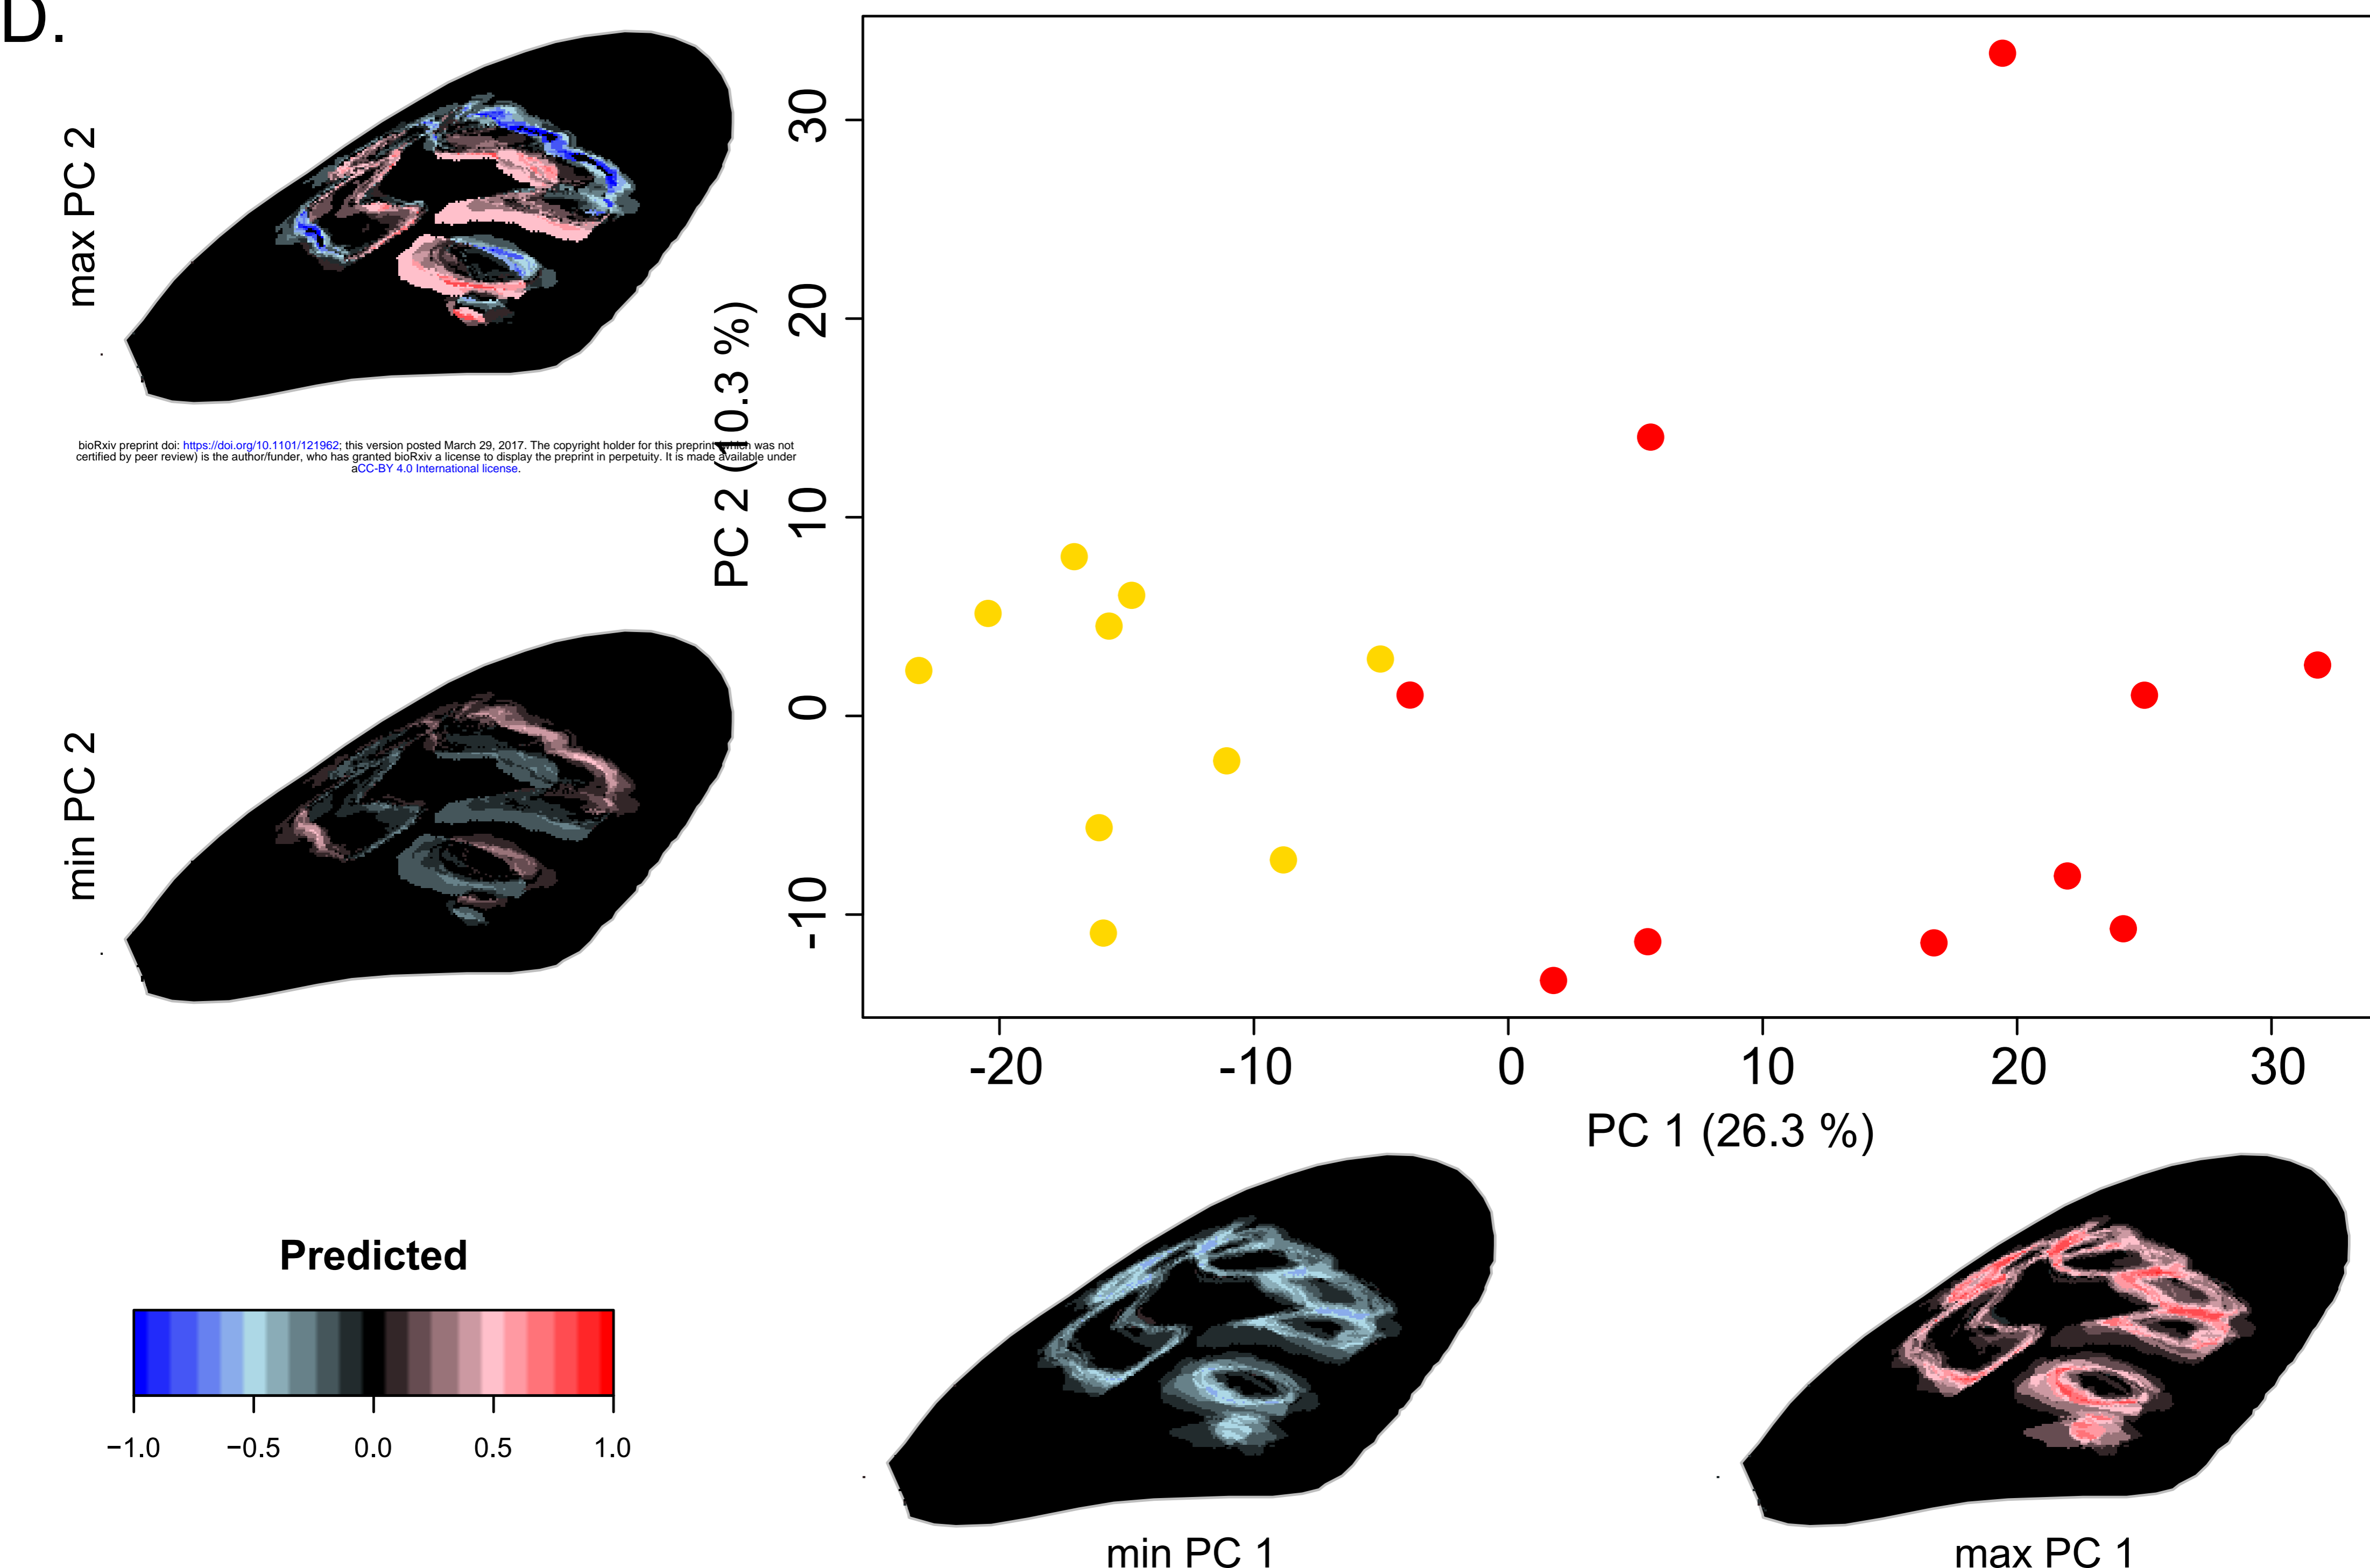

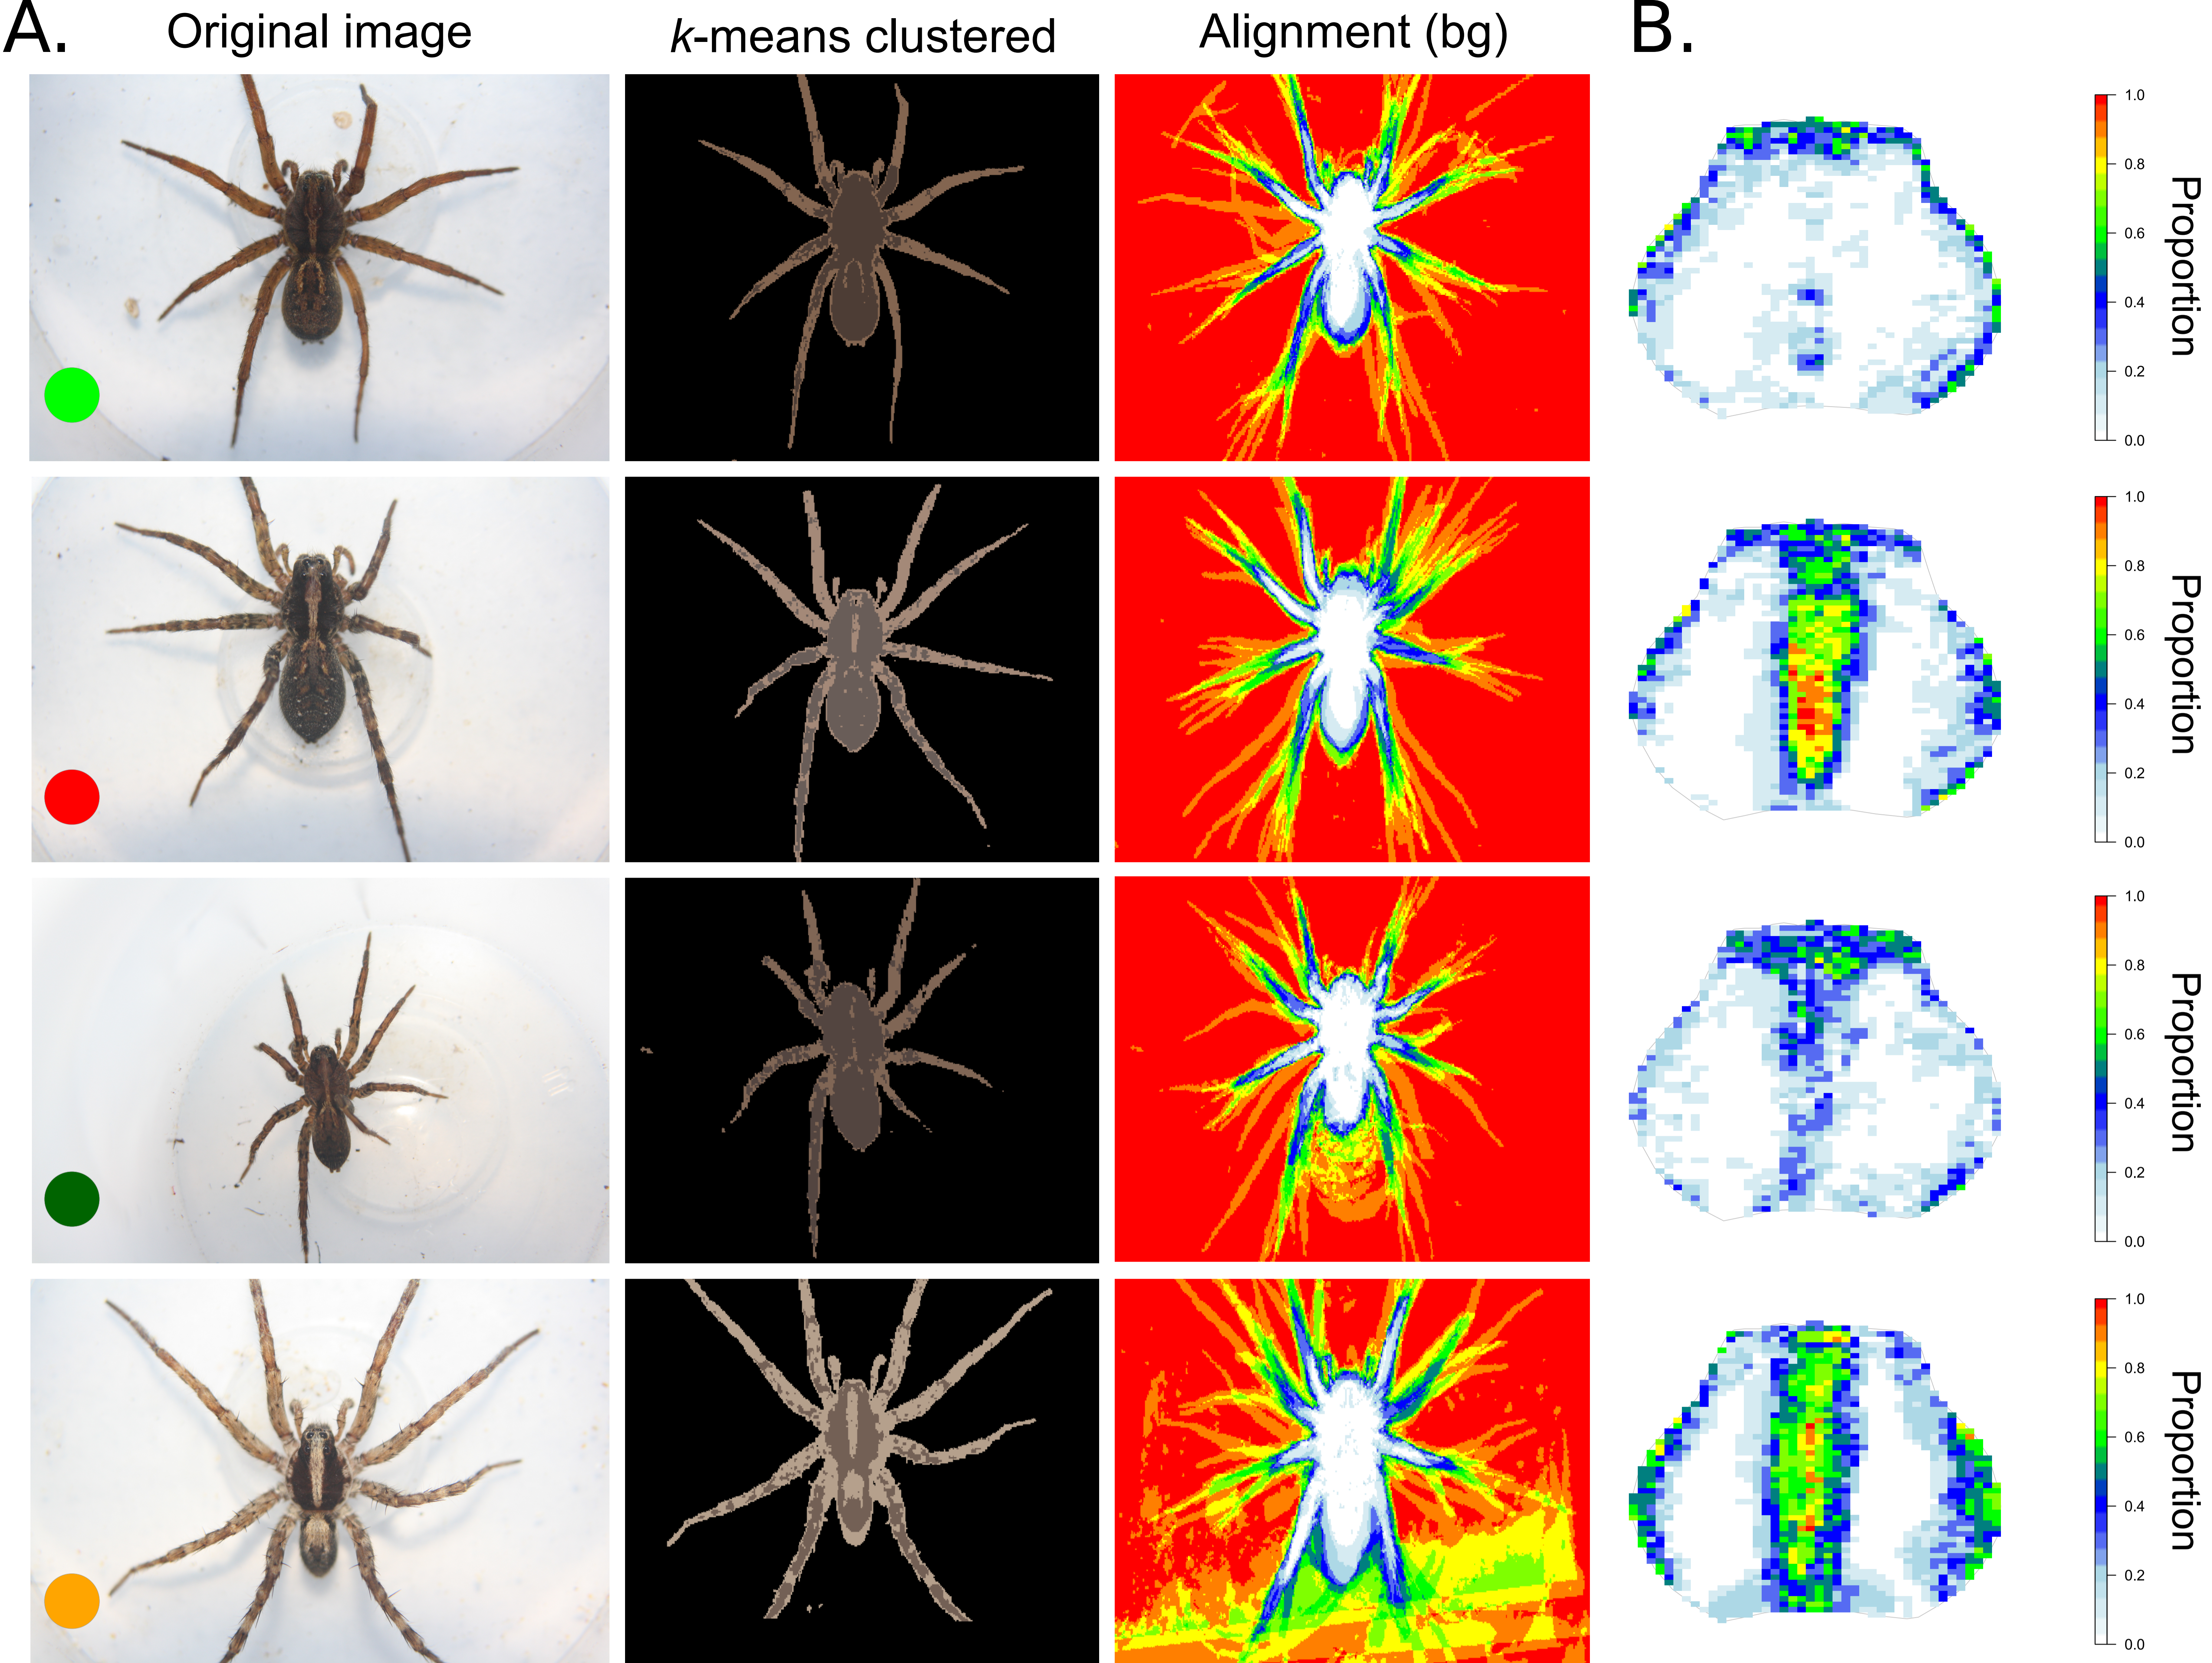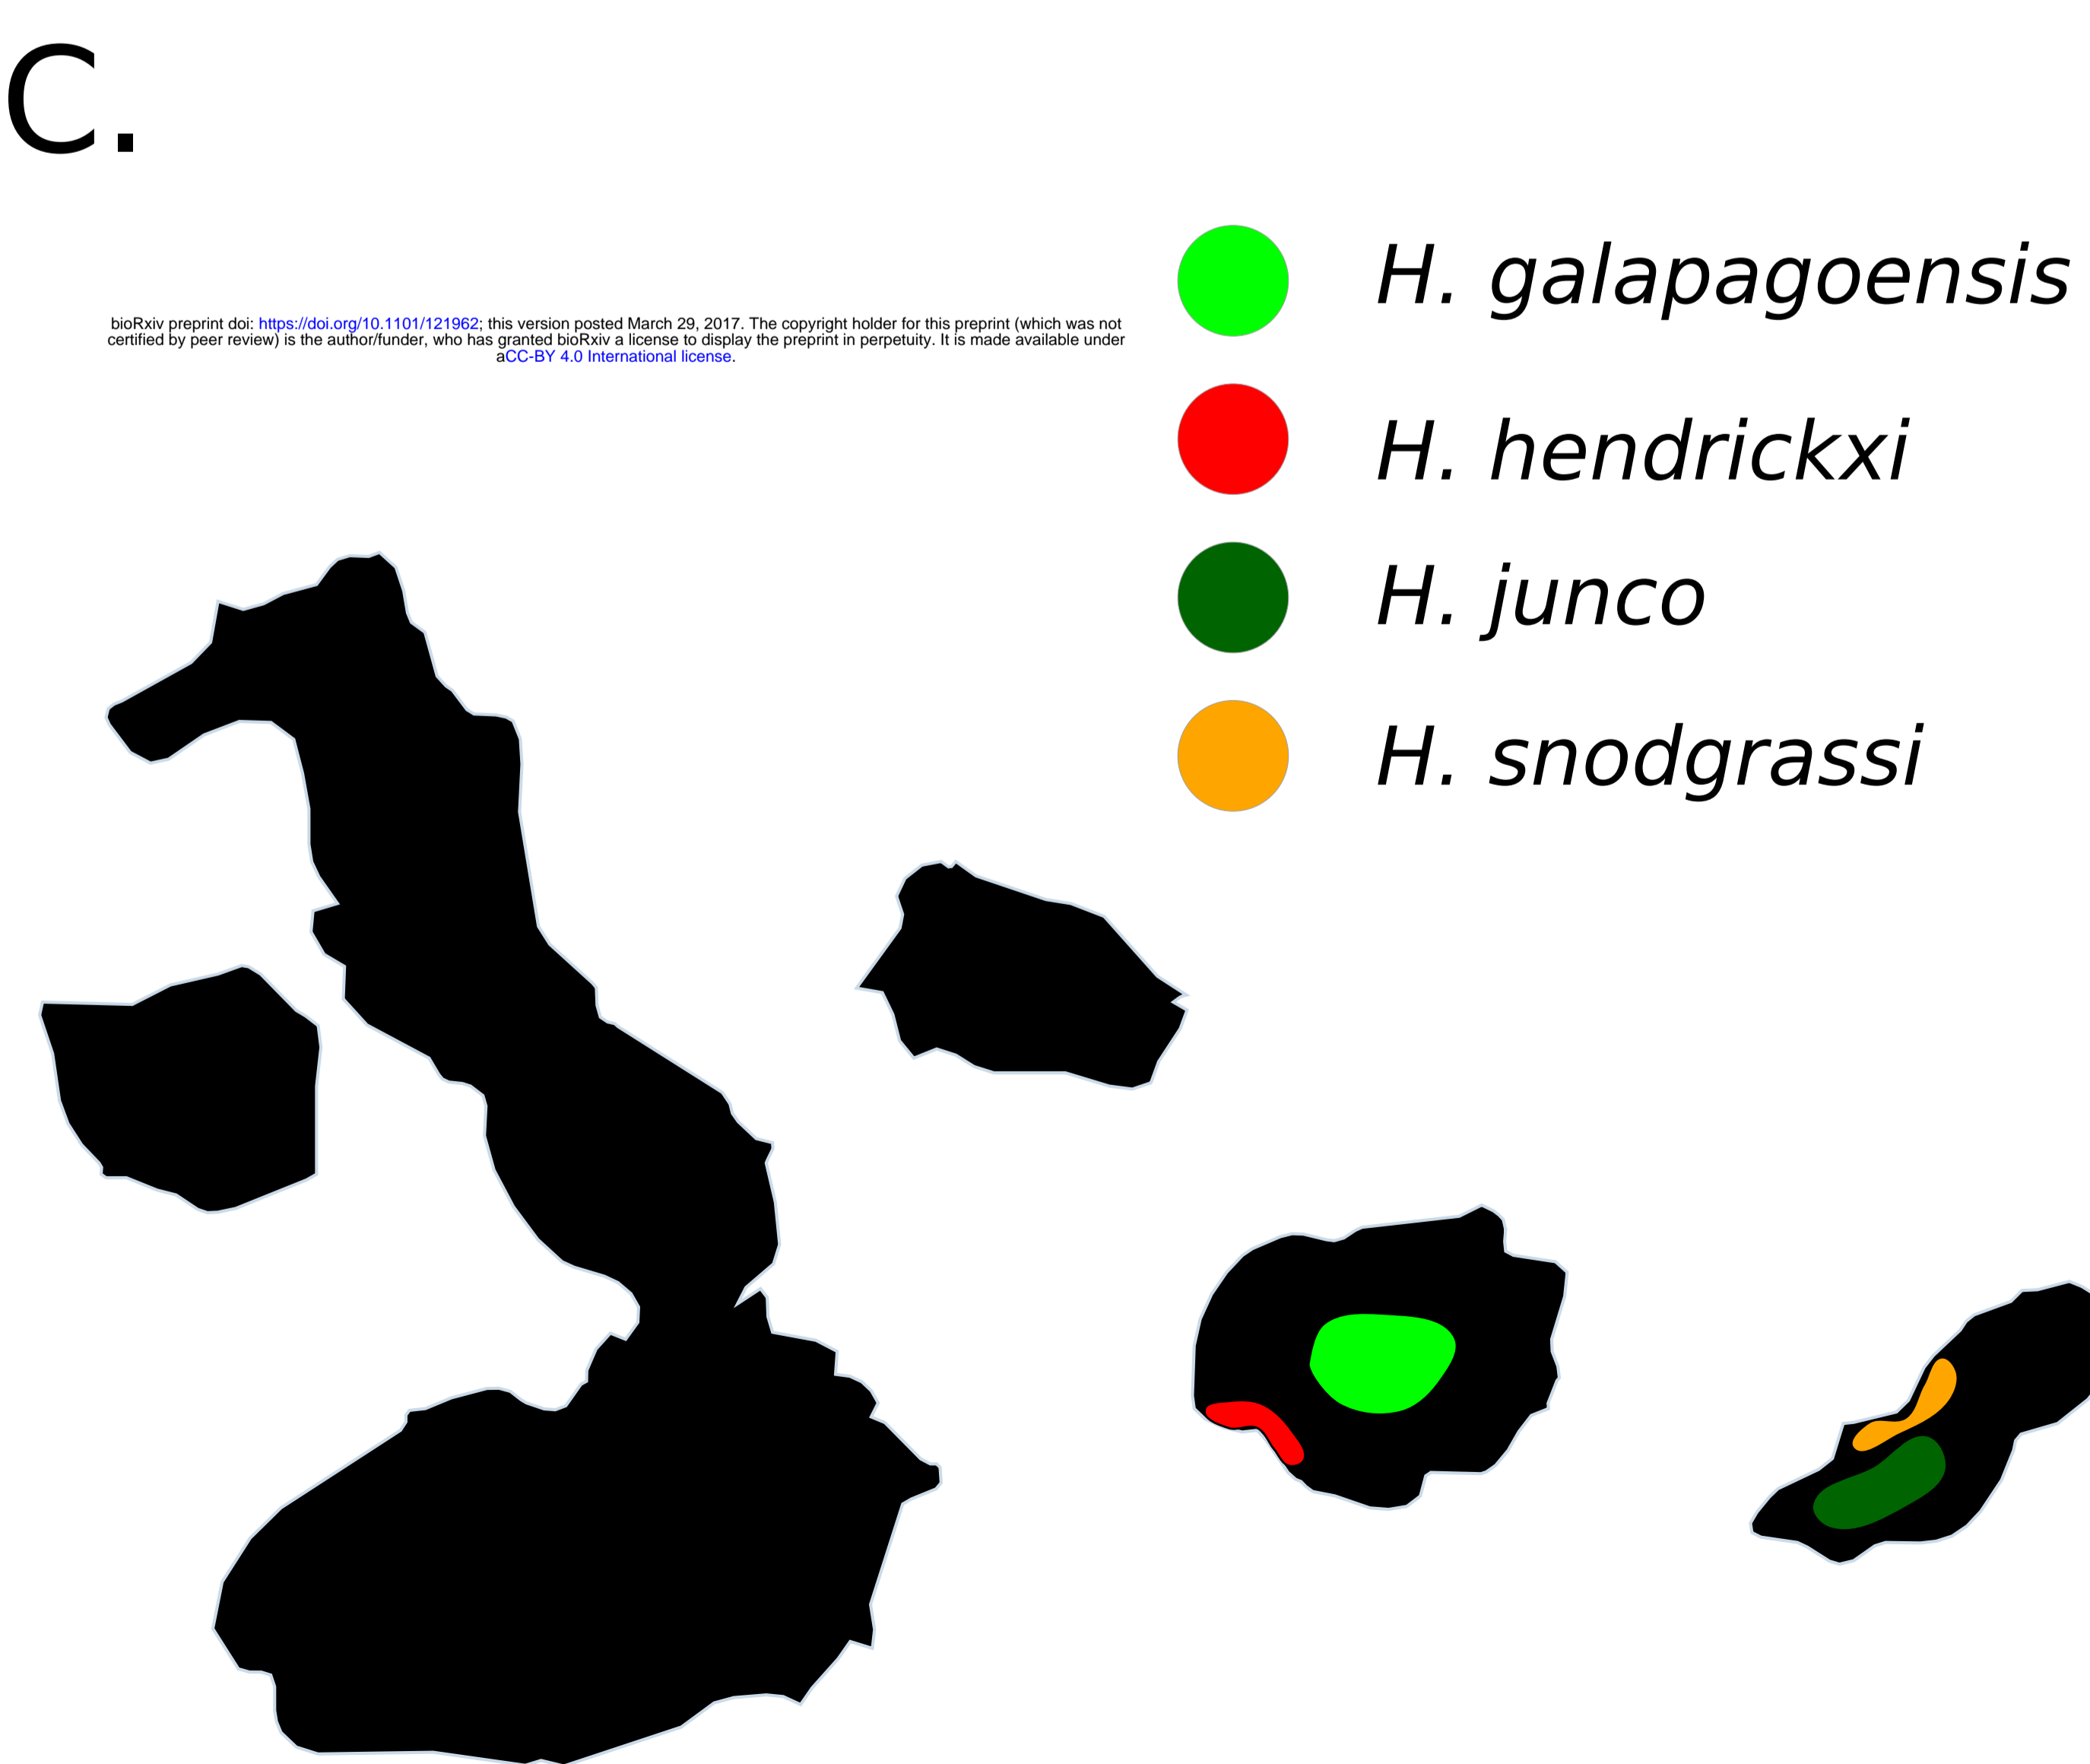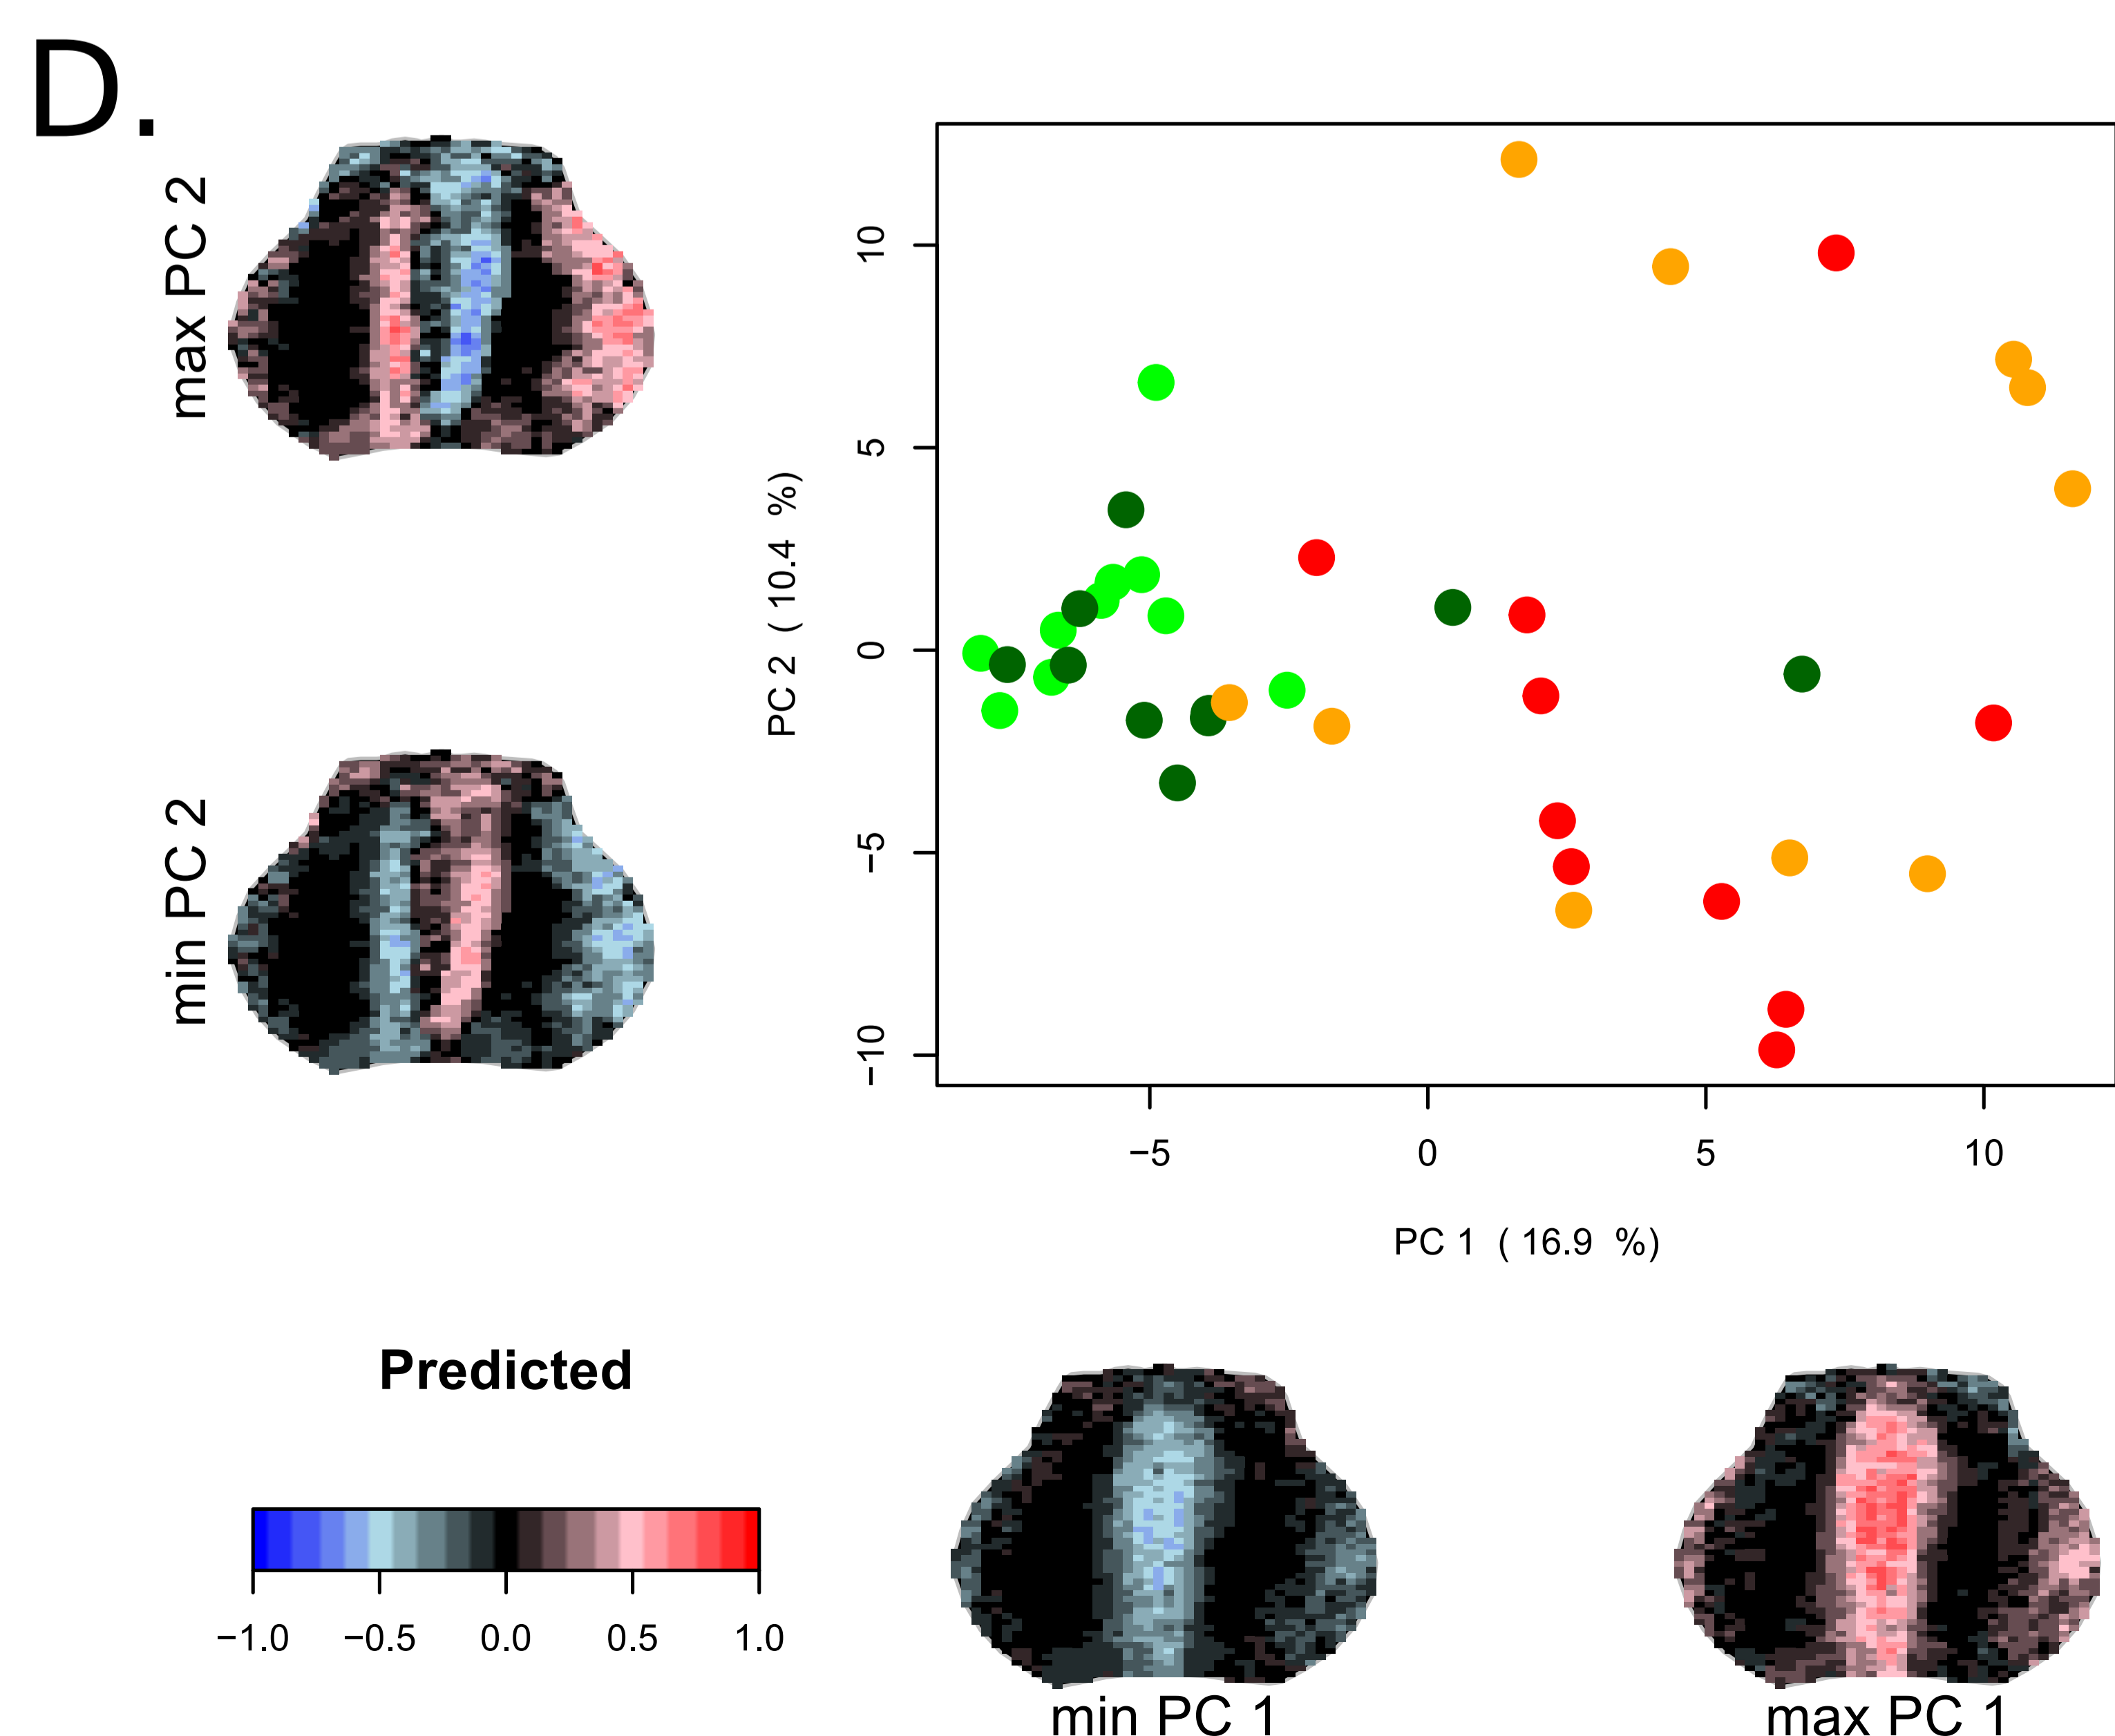

Source: https://www.biorxiv.org/content/10.1101/121962v1.full.pdf
